# Supplementary material
Source: PubMed Central journal article supplement (PMC2901178)
Supplement: NIHMS197063-supplement-Supplement.pdf [file NIHMS197063-supplement-Supplement.pdf]

## **Supplementary Material**

# **Neuropeptidomic Analysis Establishes a Major Role for Prohormone Convertase-2 in Neuropeptide Biosynthesis**

**Xin Zhang, Hui Pan, Bonnie Peng, Donald F. Steiner, John E. Pintar, and Lloyd D. Fricker**

**Journal of Neurochemistry (2010)**

### **Organization of Supplement:**

Supplemental Figures S1 to S5

- Figure S1. Processing diagram showing the traditional (A) and alternative (B) processing schemes.
- Figure S2. Scheme showing the labeling strategy and the number of replicates performed for each brain region.
- Figure S3: Representative data of MS spectra for the peptide named big SAAS.
- Figure S4: Representative data of MS spectra showing proneuropeptide Y C-terminal peptide in amygdala, thalamus, and prefrontal cortex.
- Figure S5: Representative data of MS spectra showing chromogranin B 357-373 in amygdala, hippocampus, and prefrontal cortex.

Supplemental Tables S1 to S6

- Table S1. PC2 KO data analysis (individual brain regions shown separately)
- Table S2. Neuropeptides and other secretory pathway peptides detected in wild type mouse brain but not detectable in PC2 KO mouse brain.
- Table S3. Neuropeptides and other secretory pathway peptides detected in wild type mouse brain and also detectable at lower levels in PC2 KO mouse brain.
- Table S4. Neuropeptides and other secretory pathway peptides detected in wild type mouse brain and PC2 KO mouse brain at generally similar levels.
- Table S5. Neuropeptides and other secretory pathway peptides detected in wild type mouse brain and which increased and/or were variable in PC2 KO mouse brain.
- Table S6. Peptides identified in both PC2 KO study and Cpefat/fat mouse study (data used for Figure 3).

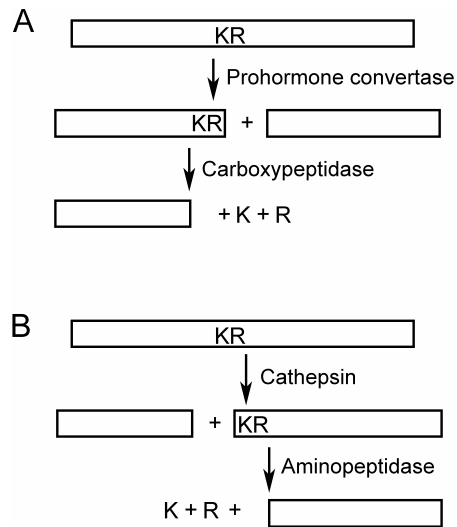

Supplemental Figure S1. Processing diagram showing the traditional (A) and alternative (B) processing schemes. A: In the traditional processing scheme, prohormone precursors are cleaved by a prohormone convertase C-terminal to the basic amino acid residues. A carboxypeptidase then trims the basic residues to generate the mature bioactive form of the peptide. B: In the alternative processing scheme that has been proposed but which is controversial, a cysteine protease such as cathepsin L cleaves the prohormone precursor N-terminal to the basic residues. An aminopeptidase then processes and removes the basic residues from the N-terminal end of the peptide intermediates

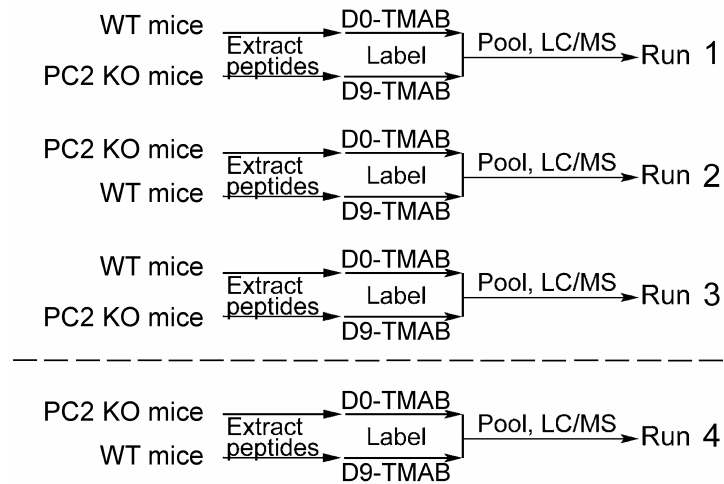

| <u>Brain Region</u> | <u>Number of replicates (LC/MS runs)</u> |
|---------------------|------------------------------------------|
| Amygdala            | 3                                        |
| Hippocampus         | 3                                        |
| Hypothalamus        | 4                                        |
| Prefrontal Cortex   | 3                                        |
| Striatum            | 3                                        |
| Thalamus            | 3                                        |

Supplemental Figure S2. Scheme showing the labeling strategy and the number of replicates performed for each brain region. Microwave irradiated tissue was extracted and processed as described in Material and Methods. The tissues from either WT or PC2 KO brains were differentially labeled as indicated. The labeled samples were combined and each PC2 KO/WT pool was analyzed in a single LC-MS run. Three replicates were analyzed for extracts from all brain regions except hypothalamus, which was analyzed in 4 replicates as previously described (Pan et al. 2006).

Big SAAS ARPVKEPRSLSAASAPLVETSTPLRL

5+, 2 tags Mi = 2745.550

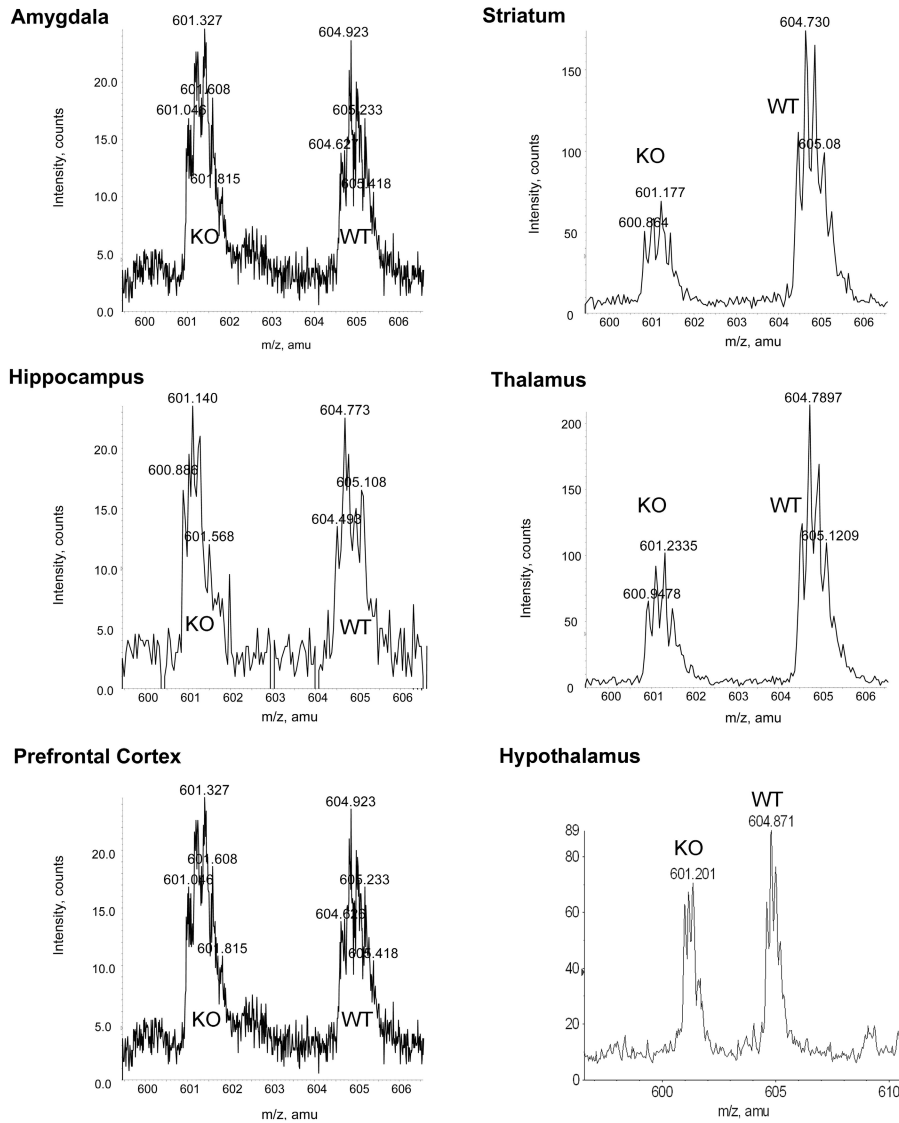

Supplemental Figure S3: Representative data of MS spectra for the peptide named big SAAS.

Note that in amygdala, hippocampus, and prefrontal cortex the levels are comparable in the PC2 KO and WT groups, whereas in the striatum and thalamus levels are much lower in the KO group, and in the hypothalamus levels are slightly lower in the KO group. This peptide has a monoisotopic mass of 2745.550 in the absence of protons and isotopic tags. In the spectra shown the peptide has 2 TMAB tags and 3 protons (total charge 5+).

ProNPY C-terminal region  
SSPETLISDLLMKESTENAPRTRLEDPSMW  
4+, 2 tags                      Mi = 3432.654

### Amygdala

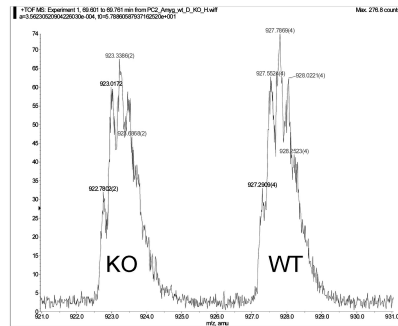

### Thalamus

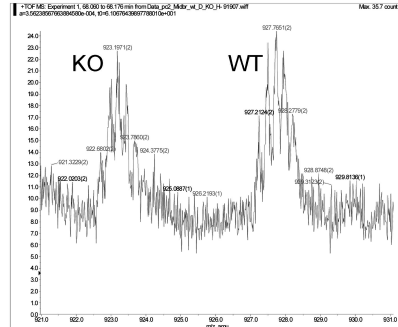

### Prefrontal Cortex

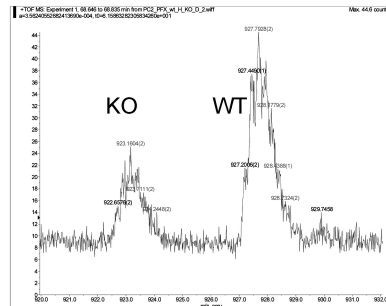

Supplemental Figure S4: Representative data of MS spectra showing proneuropeptide Y C-terminal peptide in amygdala, thalamus, and prefrontal cortex. The peptide has a monoisotopic mass of 3432.654 in the absence of protons and isotopic tags, and in the examples shown has 2 tags and 2 protons (total 4+).

Chromogranin B 357-373  
(GLQTRGRGSEEDRAPRP)  
5+, 1 tags                      Mi = 1942.972

**Amygdala**

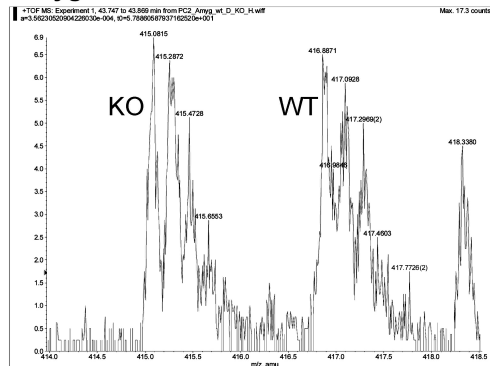

**Hippocampus**

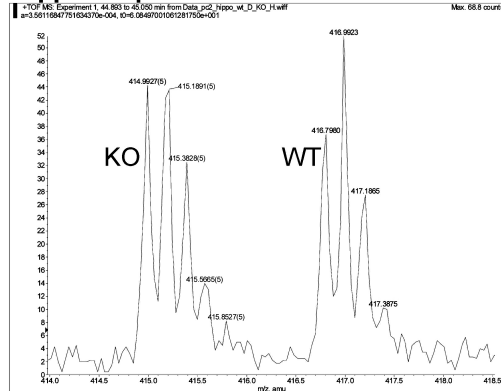

**Prefrontal Cortex**

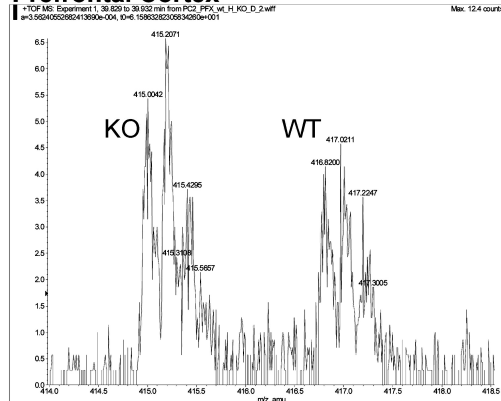

Supplemental Figure S5: Representative data of MS spectra showing chromogranin B 357-373 in amygdala, hippocampus, and prefrontal cortex. The peptide has a monoisotopic mass of 1942.972 in the absence of protons and isotopic tags; the spectra shown are for the peptide with 1 TMAB tag and 4 protons (5+ total).

| Supplemental Table S1 - PC2 KO data analyses (individual brain regions shown separately) |                 |                       |            |     |          |           |            |     |                   |       |       |   |
|------------------------------------------------------------------------------------------|-----------------|-----------------------|------------|-----|----------|-----------|------------|-----|-------------------|-------|-------|---|
| Abbreviations are defined in other supplemental tables                                   |                 |                       |            |     | Relative |           |            |     |                   |       |       |   |
| Precursor                                                                                | Peptide Name    | Peptide Sequence      | Elute Time |     | #Tags    | Obs. Mass | Theo. Mass | ppm | PC2 KO:WT         |       |       |   |
|                                                                                          |                 |                       | (min)      | z   |          |           |            |     | Regions           | Avg   | Stdev | n |
| 7B2                                                                                      | 167-176         | (LLYEKMKGGQ)          | 58         | 3   | 3        | 1165.66   | 1165.60    | 36  | Prefrontal cortex | <0.10 |       | 2 |
| 7B2                                                                                      | 167-176         | (LLYEKMKGGQ)          | 58         | 3   | 3        | 1165.68   | 1165.60    | 36  | Thalamus          | <0.10 |       | 1 |
| CART                                                                                     | 33-50           | APGAMLQIEALQEV LKKL   | 82         | 3   | 3        | 1951.11   | 1951.12    | -31 | Amygdala          | <0.10 |       | 2 |
| CART                                                                                     | 33-50           | APGAMLQIEALQEV LKKL   | 82         | 3   | 3        | 1951.11   | 1951.12    | -31 | Hypothalamus      | 0.19  | 0.03  | 4 |
| CART                                                                                     | 33-50           | APGAMLQIEALQEV LKKL   | 82         | 3   | 3        | 1951.11   | 1951.12    | -31 | Thalamus          | 0.10  |       | 3 |
| CART                                                                                     | 33-52           | APGAMLQIEALQEV LKKLKS | 76         | 4   | 4        | 2166.36   | 2166.25    | -23 | Amygdala          | <0.10 |       | 3 |
| CART                                                                                     | 33-52           | APGAMLQIEALQEV LKKLKS | 76         | 4   | 4        | 2166.36   | 2166.25    | -23 | Hypothalamus      | <0.10 |       | 1 |
| CART                                                                                     | 33-52           | APGAMLQIEALQEV LKKLKS | 76         | 4   | 4        | 2166.36   | 2166.25    | -23 | Thalamus          | <0.10 |       | 1 |
| Cerebellin 1 precursor                                                                   | Cerebellin 2-15 | GS AKVAFSAIRSTN       | 55         | 3   | 2        | 1407.75   | 1407.75    | 17  | Amygdala          | 1.18  | 0.10  | 3 |
| Cerebellin 1 precursor                                                                   | Cerebellin 2-15 | GS AKVAFSAIRSTN       | 55         | 3   | 2        | 1407.75   | 1407.75    | 17  | Hippocampus       | 0.93  | 0.17  | 3 |
| Cerebellin 1 precursor                                                                   | Cerebellin 2-15 | GS AKVAFSAIRSTN       | 55         | 3   | 2        | 1407.75   | 1407.75    | 17  | Hypothalamus      | 1.22  | 0.34  | 3 |
| Cerebellin 1 precursor                                                                   | Cerebellin 2-15 | GS AKVAFSAIRSTN       | 55         | 3   | 2        | 1407.75   | 1407.75    | 17  | Prefrontal cortex | 0.87  | 0.09  | 2 |
| Cerebellin 1 precursor                                                                   | Cerebellin 2-15 | GS AKVAFSAIRSTN       | 55         | 3   | 2        | 1407.75   | 1407.75    | 17  | Striatum          | 1.02  | 0.15  | 3 |
| Cerebellin 1 precursor                                                                   | Cerebellin 2-15 | GS AKVAFSAIRSTN       | 55         | 3   | 2        | 1407.75   | 1407.75    | 17  | Thalamus          | 0.94  | 0.40  | 3 |
| Cerebellin 1 precursor                                                                   | Cerebellin 1-15 | SGS AKVAFSAIRSTN      | 55         | 3   | 1,2      | 1494.73   | 1494.78    | 20  | Amygdala          | 1.11  | 0.09  | 2 |
| Cerebellin 1 precursor                                                                   | Cerebellin 1-15 | SGS AKVAFSAIRSTN      | 55         | 3   | 1,2      | 1494.73   | 1494.78    | 20  | Hippocampus       | 0.97  | 0.14  | 3 |
| Cerebellin 1 precursor                                                                   | Cerebellin 1-15 | SGS AKVAFSAIRSTN      | 55         | 3   | 1,2      | 1494.73   | 1494.78    | 20  | Hypothalamus      | 0.98  | 0.22  | 3 |
| Cerebellin 1 precursor                                                                   | Cerebellin 1-15 | SGS AKVAFSAIRSTN      | 55         | 3   | 1,2      | 1494.73   | 1494.78    | 20  | Prefrontal cortex | 0.83  | 0.21  | 3 |
| Cerebellin 1 precursor                                                                   | Cerebellin 1-15 | SGS AKVAFSAIRSTN      | 55         | 3   | 1,2      | 1494.73   | 1494.78    | 20  | Striatum          | 0.78  | 0.23  | 3 |
| Cerebellin 1 precursor                                                                   | Cerebellin 1-15 | SGS AKVAFSAIRSTN      | 55         | 3   | 1,2      | 1494.73   | 1494.78    | 20  | Thalamus          | 0.93  | 0.36  | 3 |
| Cerebellin 1 precursor                                                                   | Cerebellin 2-16 | GS AKVAFSAIRSTNH      | 53         | 4   | 2        | 1544.77   | 1544.81    | -1  | Amygdala          | 0.89  | 0.10  | 2 |
| Cerebellin 1 precursor                                                                   | Cerebellin 2-16 | GS AKVAFSAIRSTNH      | 53         | 4   | 2        | 1544.77   | 1544.81    | -1  | Hippocampus       | 0.87  | 0.34  | 3 |
| Cerebellin 1 precursor                                                                   | Cerebellin 2-16 | GS AKVAFSAIRSTNH      | 53         | 4   | 2        | 1544.77   | 1544.81    | -1  | Hypothalamus      | 1.18  | 0.18  | 3 |
| Cerebellin 1 precursor                                                                   | Cerebellin 2-16 | GS AKVAFSAIRSTNH      | 53         | 4   | 2        | 1544.77   | 1544.81    | -1  | Prefrontal cortex | 1.01  | 0.07  | 3 |
| Cerebellin 1 precursor                                                                   | Cerebellin 2-16 | GS AKVAFSAIRSTNH      | 53         | 4   | 2        | 1544.77   | 1544.81    | -1  | Striatum          | 1.06  | 0.16  | 3 |
| Cerebellin 1 precursor                                                                   | Cerebellin 2-16 | GS AKVAFSAIRSTNH      | 53         | 4   | 2        | 1544.77   | 1544.81    | -1  | Thalamus          | 1.05  | 0.40  | 3 |
| Cerebellin 1 precursor                                                                   | Cerebellin      | SGS AKVAFSAIRSTNH     | 53         | 3,4 | 1,2      | 1631.79   | 1631.84    | 15  | Amygdala          | 1.02  | 0.15  | 3 |
| Cerebellin 1 precursor                                                                   | Cerebellin      | SGS AKVAFSAIRSTNH     | 53         | 3,4 | 1,2      | 1631.79   | 1631.84    | 15  | Hippocampus       | 1.06  | 0.11  | 2 |
| Cerebellin 1 precursor                                                                   | Cerebellin      | SGS AKVAFSAIRSTNH     | 53         | 3,4 | 1,2      | 1631.79   | 1631.84    | 15  | Hypothalamus      | 1.03  | 0.32  | 4 |
| Cerebellin 1 precursor                                                                   | Cerebellin      | SGS AKVAFSAIRSTNH     | 53         | 3,4 | 1,2      | 1631.79   | 1631.84    | 15  | Prefrontal cortex | 0.84  | 0.12  | 3 |
| Cerebellin 1 precursor                                                                   | Cerebellin      | SGS AKVAFSAIRSTNH     | 53         | 3,4 | 1,2      | 1631.79   | 1631.84    | 15  | Striatum          | 0.89  | 0.26  | 3 |
| Cerebellin 1 precursor                                                                   | Cerebellin      | SGS AKVAFSAIRSTNH     | 53         | 3,4 | 1,2      | 1631.79   | 1631.84    | 15  | Thalamus          | 0.83  | 0.28  | 3 |
| Cerebellin 2 precursor                                                                   | 89-102          | GS AKVAFSATRSTN       | 50         | 3   | 2        | 1395.71   | 1395.71    | 18  | Prefrontal cortex | 0.96  | 0.18  | 3 |
| Cerebellin 2 precursor                                                                   | 89-102          | GS AKVAFSATRSTN       | 50         | 3   | 2        | 1395.71   | 1395.71    | 18  | Thalamus          | 1.19  |       | 1 |
| Cerebellin 2 precursor                                                                   | 88-102          | (SGS AKVAFSATRSTN)    | 51         | 3   | 2        | 1482.79   | 1482.74    | -3  | Amygdala          | 0.94  | 0.06  | 2 |
| Cerebellin 2 precursor                                                                   | 88-102          | (SGS AKVAFSATRSTN)    | 51         | 3   | 2        | 1482.79   | 1482.74    | -3  | Hippocampus       | 0.80  |       | 1 |
| Cerebellin 2 precursor                                                                   | 88-102          | (SGS AKVAFSATRSTN)    | 51         | 3   | 2        | 1482.79   | 1482.74    | -3  | Prefrontal cortex | 0.89  | 0.08  | 3 |
| Cerebellin 2 precursor                                                                   | 88-102          | (SGS AKVAFSATRSTN)    | 51         | 3   | 2        | 1482.79   | 1482.74    | -3  | Thalamus          | 1.08  |       | 1 |
| Cerebellin 2 precursor                                                                   | 89-103          | (GS AKVAFSATRSTNH)    | 47         | 4   | 2        | 1532.66   | 1532.77    | 3   | Prefrontal cortex | 0.86  | 0.03  | 3 |
| Cerebellin 2 precursor                                                                   | 89-103          | (GS AKVAFSATRSTNH)    | 47         | 4   | 2        | 1532.66   | 1532.77    | 3   | Thalamus          | 1.12  |       | 1 |
| Cerebellin 2 precursor                                                                   | 88-103          | (SGS AKVAFSATRSTNH)   | 48         | 3,4 | 1,2      | 1619.79   | 1619.80    | 39  | Hippocampus       | 0.93  |       | 1 |
| Cerebellin 2 precursor                                                                   | 88-103          | (SGS AKVAFSATRSTNH)   | 48         | 3,4 | 1,2      | 1619.79   | 1619.80    | 39  | Prefrontal cortex | 0.89  | 0.09  | 3 |
| Cerebellin 2 precursor                                                                   | 88-103          | (SGS AKVAFSATRSTNH)   | 48         | 3,4 | 1,2      | 1619.79   | 1619.80    | 39  | Striatum          | 1.05  | 0.00  | 1 |

|                        |         |                    |    |     |     |         |         |     |                   |       |      |   |
|------------------------|---------|--------------------|----|-----|-----|---------|---------|-----|-------------------|-------|------|---|
| Cerebellin 2 precursor | 88-103  | (SGSAKVAFSATRSTNH) | 48 | 3,4 | 1,2 | 1619.79 | 1619.80 | 39  | Thalamus          | 0.95  | 0.27 | 2 |
| Cerebellin 4 precursor | 66-77   | SKVAFSAVRSTN       | 51 | 3   | 1,2 | 1265.64 | 1265.67 | 32  | Amygdala          | 0.91  | 0.10 | 3 |
| Cerebellin 4 precursor | 66-77   | SKVAFSAVRSTN       | 51 | 3   | 1,2 | 1265.64 | 1265.67 | 32  | Hippocampus       | 0.99  | 0.09 | 3 |
| Cerebellin 4 precursor | 66-77   | SKVAFSAVRSTN       | 51 | 3   | 1,2 | 1265.64 | 1265.67 | 32  | Prefrontal cortex | 0.95  | 0.10 | 3 |
| Cerebellin 4 precursor | 66-77   | SKVAFSAVRSTN       | 51 | 3   | 1,2 | 1265.64 | 1265.67 | 32  | Striatum          | 0.81  | 0.17 | 3 |
| Cerebellin 4 precursor | 66-77   | SKVAFSAVRSTN       | 51 | 3   | 1,2 | 1265.64 | 1265.67 | 32  | Thalamus          | 0.89  | 0.19 | 3 |
| Cerebellin 4 precursor | 64-77   | ANSKVAFSAVRSTN     | 53 | 3   | 2   | 1450.77 | 1450.75 | 9   | Amygdala          | 0.98  | 0.05 | 3 |
| Cerebellin 4 precursor | 64-77   | ANSKVAFSAVRSTN     | 53 | 3   | 2   | 1450.77 | 1450.75 | 9   | Hippocampus       | 0.82  | 0.15 | 3 |
| Cerebellin 4 precursor | 64-77   | ANSKVAFSAVRSTN     | 53 | 3   | 2   | 1450.77 | 1450.75 | 9   | Prefrontal cortex | 0.88  | 0.15 | 3 |
| Cerebellin 4 precursor | 64-77   | ANSKVAFSAVRSTN     | 53 | 3   | 2   | 1450.77 | 1450.75 | 9   | Thalamus          | 1.08  |      | 1 |
| Cerebellin 4 precursor | 63-77   | AANSKVAFSAVRSTN    | 53 | 3   | 2   | 1521.77 | 1521.79 | 18  | Hippocampus       | 1.04  | 0.20 | 3 |
| Cerebellin 4 precursor | 63-77   | AANSKVAFSAVRSTN    | 53 | 3   | 2   | 1521.77 | 1521.79 | 18  | Prefrontal cortex | 1.16  | 0.02 | 2 |
| Cerebellin 4 precursor | 63-77   | AANSKVAFSAVRSTN    | 53 | 3   | 2   | 1521.77 | 1521.79 | 18  | Thalamus          | 1.18  |      | 1 |
| Chromogranin A         | 392-402 | AYGFRDPGPQL        | 60 | 2   | 1,2 | 1219.64 | 1219.60 | 9   | Hippocampus       | <0.10 |      | 3 |
| Chromogranin A         | 392-402 | AYGFRDPGPQL        | 60 | 2   | 1,2 | 1219.64 | 1219.60 | 9   | Hypothalamus      | <0.10 |      | 3 |
| Chromogranin A         | 392-402 | AYGFRDPGPQL        | 60 | 2   | 1,2 | 1219.64 | 1219.60 | 9   | Prefrontal cortex | <0.10 |      | 2 |
| Chromogranin A         | 358-371 | WSRMDQLAKELTAE     | 61 | 3   | 2   | 1248.22 | 1676.82 | 8   | Amygdala          | <0.10 |      | 3 |
| Chromogranin A         | 358-371 | WSRMDQLAKELTAE     | 67 | 3   | 2   | 1676.85 | 1676.82 | 14  | Hippocampus       | <0.10 |      | 3 |
| Chromogranin A         | 358-371 | WSRMDQLAKELTAE     | 67 | 3   | 2   | 1676.85 | 1676.82 | 14  | Hypothalamus      | <0.10 |      | 2 |
| Chromogranin A         | 358-371 | WSRMDQLAKELTAE     | 67 | 3   | 2   | 1676.85 | 1676.82 | 14  | Prefrontal cortex | <0.10 |      | 2 |
| Chromogranin A         | 358-371 | WSRMDQLAKELTAE     | 67 | 3   | 2   | 1676.85 | 1676.82 | 14  | Thalamus          | <0.10 |      | 3 |
| Chromogranin A         | 374-390 | LEGEDDPDRSMKLSFRT  | 59 | 4   | 2   | 1994.97 | 1994.94 | 24  | Amygdala          | <0.10 |      | 3 |
| Chromogranin A         | 374-390 | LEGEDDPDRSMKLSFRT  | 59 | 4   | 2   | 1994.97 | 1994.94 | 24  | Hippocampus       | <0.10 |      | 1 |
| Chromogranin A         | 374-390 | LEGEDDPDRSMKLSFRT  | 59 | 4   | 2   | 1994.97 | 1994.94 | 24  | Hypothalamus      | <0.10 |      | 4 |
| Chromogranin A         | 374-390 | LEGEDDPDRSMKLSFRT  | 59 | 4   | 2   | 1994.97 | 1994.94 | 24  | Prefrontal cortex | <0.10 |      | 3 |
| Chromogranin A         | 374-390 | LEGEDDPDRSMKLSFRT  | 59 | 4   | 2   | 1994.97 | 1994.94 | 24  | Striatum          | <0.10 |      | 2 |
| Chromogranin A         | 374-390 | LEGEDDPDRSMKLSFRT  | 59 | 4   | 2   | 1994.97 | 1994.94 | 24  | Thalamus          | <0.10 |      | 3 |
| Chromogranin B         | 438-446 | LLDEGHYPV          | 62 | 2   | 1   | 1041.50 | 1041.52 | 9   | Amygdala          | 0.56  | 0.02 | 2 |
| Chromogranin B         | 438-446 | LLDEGHYPV          | 62 | 2   | 1   | 1041.50 | 1041.52 | 9   | Hippocampus       | 0.55  | 0.13 | 3 |
| Chromogranin B         | 438-446 | LLDEGHYPV          | 62 | 2   | 1   | 1041.50 | 1041.52 | 9   | Hypothalamus      | 0.71  | 0.11 | 4 |
| Chromogranin B         | 438-446 | LLDEGHYPV          | 62 | 2   | 1   | 1041.50 | 1041.52 | 9   | Prefrontal cortex | 0.66  | 0.09 | 2 |
| Chromogranin B         | 438-446 | LLDEGHYPV          | 62 | 2   | 1   | 1041.50 | 1041.52 | 9   | Striatum          | 0.43  | 0.05 | 2 |
| Chromogranin B         | 438-446 | LLDEGHYPV          | 62 | 2   | 1   | 1041.50 | 1041.52 | 9   | Thalamus          | 0.46  | 0.24 | 2 |
| Chromogranin B         | 588-597 | SFARAPQLDL         | 62 | 2   | 1   | 1116.56 | 1116.59 | 1   | Amygdala          | 0.32  | 0.04 | 3 |
| Chromogranin B         | 588-597 | SFARAPQLDL         | 62 | 2   | 1   | 1116.56 | 1116.59 | 1   | Hippocampus       | 0.28  | 0.04 | 3 |
| Chromogranin B         | 588-597 | SFARAPQLDL         | 62 | 2   | 1   | 1116.56 | 1116.59 | 1   | Hypothalamus      | 0.48  | 0.09 | 3 |
| Chromogranin B         | 588-597 | SFARAPQLDL         | 62 | 2   | 1   | 1116.56 | 1116.59 | 1   | Prefrontal cortex | 0.46  | 0.01 | 2 |
| Chromogranin B         | 588-597 | SFARAPQLDL         | 62 | 2   | 1   | 1116.56 | 1116.59 | 1   | Striatum          | 0.17  | 0.10 | 3 |
| Chromogranin B         | 588-597 | SFARAPQLDL         | 62 | 2   | 1   | 1116.56 | 1116.59 | 1   | Thalamus          | 0.25  | 0.03 | 2 |
| Chromogranin B         | 457-466 | YPQSKWQEQUE        | 55 | 2   | 2   | 1321.67 | 1321.59 | -14 | Hippocampus       | <0.10 |      | 1 |
| Chromogranin B         | 457-466 | YPQSKWQEQUE        | 55 | 2   | 2   | 1321.67 | 1321.59 | -14 | Prefrontal cortex | <0.10 |      | 1 |
| Chromogranin B         | 600-613 | QYDGVAEILDQLLHY    | 74 | 2   | 1   | 1662.76 | 1662.79 | -2  | Amygdala          | <0.10 |      | 2 |
| Chromogranin B         | 600-613 | QYDGVAEILDQLLHY    | 74 | 2   | 1   | 1662.76 | 1662.79 | -2  | Hippocampus       | <0.10 |      | 3 |
| Chromogranin B         | 600-613 | QYDGVAEILDQLLHY    | 74 | 2   | 1   | 1662.76 | 1662.79 | -2  | Prefrontal cortex | <0.10 |      | 2 |
| Chromogranin B         | 600-613 | QYDGVAEILDQLLHY    | 74 | 2   | 1   | 1662.76 | 1662.79 | -2  | Thalamus          | <0.10 |      | 2 |
| Chromogranin B         | 438-453 | LLDEGHYPVRESPIDT   | 60 | 3   | 1   | 1839.91 | 1839.90 | -2  | Amygdala          | <0.10 |      | 3 |
| Chromogranin B         | 438-453 | LLDEGHYPVRESPIDT   | 60 | 3   | 1   | 1839.91 | 1839.90 | -2  | Hippocampus       | <0.10 |      | 3 |



|                |                     |                            |    |     |     |         |         |     |                   |       |      |   |
|----------------|---------------------|----------------------------|----|-----|-----|---------|---------|-----|-------------------|-------|------|---|
| Chromogranin B | 438-453             | LLDEGHYPVRESPI DT          | 60 | 3   | 1   | 1839.91 | 1839.90 | -2  | Hypothalamus      | <0.10 |      | 4 |
| Chromogranin B | 438-453             | LLDEGHYPVRESPI DT          | 60 | 3   | 1   | 1839.91 | 1839.90 | -2  | Striatum          | <0.10 |      | 1 |
| Chromogranin B | 438-454             | LLDEGHYPVRESPI DTA         | 60 | 3   | 1   | 1910.91 | 1910.93 | 5   | Amygdala          | <0.10 |      | 3 |
| Chromogranin B | 438-454             | LLDEGHYPVRESPI DTA         | 60 | 3   | 1   | 1910.91 | 1910.93 | 5   | Hippocampus       | <0.10 |      | 3 |
| Chromogranin B | 438-454             | LLDEGHYPVRESPI DTA         | 60 | 3   | 1   | 1910.91 | 1910.93 | 5   | Hypothalamus      | <0.10 |      | 4 |
| Chromogranin B | 438-454             | LLDEGHYPVRESPI DTA         | 60 | 3   | 1   | 1910.91 | 1910.93 | 5   | Prefrontal cortex | <0.10 |      | 2 |
| Chromogranin B | 438-454             | LLDEGHYPVRESPI DTA         | 60 | 3   | 1   | 1910.91 | 1910.93 | 5   | Striatum          | <0.10 |      | 3 |
| Chromogranin B | 438-454             | LLDEGHYPVRESPI DTA         | 60 | 3   | 1   | 1910.91 | 1910.93 | 5   | Thalamus          | <0.10 |      | 2 |
| Chromogranin B | 313-330             | PSPKESKEADVATVRLGE         | 55 | 4   | 3   | 1912.05 | 1911.99 | 16  | Amygdala          | <0.10 |      | 3 |
| Chromogranin B | 313-330             | PSPKESKEADVATVRLGE         | 55 | 4   | 3   | 1912.05 | 1911.99 | 16  | Hippocampus       | <0.10 |      | 3 |
| Chromogranin B | 313-330             | PSPKESKEADVATVRLGE         | 55 | 4   | 3   | 1912.05 | 1911.99 | 16  | Prefrontal cortex | <0.10 |      | 2 |
| Chromogranin B | 313-330             | PSPKESKEADVATVRLGE         | 55 | 4   | 3   | 1912.05 | 1911.99 | 16  | Thalamus          | <0.10 |      | 1 |
| Chromogranin B | 357-373             | (GLQTRGRGSEEDRAPRP)        | 48 | 5   | 1   | 1943.09 | 1942.97 | 24  | Amygdala          | 1.16  | 0.18 | 3 |
| Chromogranin B | 357-373             | (GLQTRGRGSEEDRAPRP)        | 48 | 5   | 1   | 1943.09 | 1942.97 | 24  | Hippocampus       | 1.25  | 0.28 | 3 |
| Chromogranin B | 357-373             | (GLQTRGRGSEEDRAPRP)        | 48 | 5   | 1   | 1943.09 | 1942.97 | 24  | Hypothalamus      | 0.99  | 0.14 | 2 |
| Chromogranin B | 357-373             | (GLQTRGRGSEEDRAPRP)        | 48 | 5   | 1   | 1943.09 | 1942.97 | 24  | Prefrontal cortex | 1.48  | 0.20 | 3 |
| Chromogranin B | 357-373             | (GLQTRGRGSEEDRAPRP)        | 48 | 5   | 1   | 1943.09 | 1942.97 | 24  | Striatum          | 1.20  |      | 1 |
| Chromogranin B | 357-373             | (GLQTRGRGSEEDRAPRP)        | 48 | 5   | 1   | 1943.09 | 1942.97 | 24  | Thalamus          | 1.56  |      | 1 |
| Chromogranin B | 357-373 + phosphate | (GLQYRGRGpSEEDRAPRP)       | 50 | 4   | 1   | 2022.91 | 2022.97 | -4  | Amygdala          | 1.27  | 0.10 | 3 |
| Chromogranin B | 357-373 + phosphate | (GLQYRGRGpSEEDRAPRP)       | 49 | 4   | 1   | 2022.91 | 2022.97 | -4  | Hippocampus       | 1.55  | 0.20 | 2 |
| Chromogranin B | 357-373 + phosphate | (GLQYRGRGpSEEDRAPRP)       | 49 | 4   | 1   | 2022.91 | 2022.97 | -4  | Hypothalamus      | 1.06  | 0.19 | 3 |
| Chromogranin B | 357-373 + phosphate | (GLQYRGRGpSEEDRAPRP)       | 49 | 4   | 1   | 2022.91 | 2022.97 | -4  | Prefrontal cortex | 1.51  | 0.21 | 2 |
| Chromogranin B | 357-373 + phosphate | (GLQYRGRGpSEEDRAPRP)       | 49 | 4   | 1   | 2022.91 | 2022.97 | -4  | Striatum          | 1.07  | 0.09 | 3 |
| Chromogranin B | 357-374             | GLQYRGRGSEEDRAPRPR         | 45 | 5,6 | 1   | 2099.12 | 2099.07 | 37  | Amygdala          | 0.82  | 0.06 | 3 |
| Chromogranin B | 357-374             | GLQYRGRGSEEDRAPRPR         | 45 | 5,6 | 1   | 2099.12 | 2099.07 | 37  | Hippocampus       | 0.96  | 0.16 | 3 |
| Chromogranin B | 357-374             | GLQYRGRGSEEDRAPRPR         | 45 | 5,6 | 1   | 2099.12 | 2099.07 | 37  | Prefrontal cortex | 1.07  | 0.18 | 3 |
| Chromogranin B | 357-374             | GLQYRGRGSEEDRAPRPR         | 45 | 5,6 | 1   | 2099.12 | 2099.07 | 37  | Striatum          | 1.19  | 0.17 | 3 |
| Chromogranin B | 357-374 + phosphate | GLQYRGRG-phosphoSEEDRAPRPR | 47 | 4,5 | 1   | 2179.05 | 2179.07 | 23  | Amygdala          | 0.90  | 0.05 | 3 |
| Chromogranin B | 357-374 + phosphate | GLQYRGRG-phosphoSEEDRAPRPR | 47 | 4,5 | 1   | 2179.05 | 2179.07 | 23  | Hippocampus       | 1.12  | 0.19 | 3 |
| Chromogranin B | 357-374 + phosphate | GLQYRGRG-phosphoSEEDRAPRPR | 47 | 4,5 | 1   | 2179.05 | 2179.07 | 23  | Hypothalamus      | 1.09  | 0.07 | 2 |
| Chromogranin B | 357-374 + phosphate | GLQYRGRG-phosphoSEEDRAPRPR | 47 | 4,5 | 1   | 2179.05 | 2179.07 | 23  | Prefrontal cortex | 1.15  | 0.20 | 3 |
| Chromogranin B | 357-374 + phosphate | GLQYRGRG-phosphoSEEDRAPRPR | 47 | 4,5 | 1   | 2179.05 | 2179.07 | 23  | Striatum          | 0.97  | 0.15 | 3 |
| Chromogranin B | 357-374 + phosphate | GLQYRGRG-phosphoSEEDRAPRPR | 47 | 4,5 | 1   | 2179.05 | 2179.07 | 23  | Thalamus          | 1.07  | 0.21 | 3 |
| Chromogranin B | 64-83               | (SGKEVKGEEKGENQNSKFEV)     | 55 | 7   | 5   | 2222.13 | 2222.08 | 36  | Hippocampus       | 0.94  |      | 1 |
| Chromogranin B | 64-83               | (SGKEVKGEEKGENQNSKFEV)     | 55 | 7   | 5   | 2222.13 | 2222.08 | 36  | Prefrontal cortex | 1.00  | 0.09 | 3 |
| Chromogranin B | 64-83               | (SGKEVKGEEKGENQNSKFEV)     | 55 | 7   | 5   | 2222.13 | 2222.08 | 36  | Striatum          | 1.10  |      | 1 |
| Chromogranin B | 64-83               | (SGKEVKGEEKGENQNSKFEV)     | 55 | 7   | 5   | 2222.13 | 2222.08 | 36  | Thalamus          | 1.02  | 0.05 | 2 |
| Chromogranin B | 516-535             | LGALFNYPYFDPLQWKNSDFE      | 82 | 2,3 | 1,2 | 2400.24 | 2400.15 | -4  | Amygdala          | 0.44  | 0.06 | 2 |
| Chromogranin B | 516-535             | LGALFNYPYFDPLQWKNSDFE      | 82 | 2,3 | 1,2 | 2400.24 | 2400.15 | -4  | Hippocampus       | 0.20  | 0.10 | 2 |
| Chromogranin B | 516-535             | LGALFNYPYFDPLQWKNSDFE      | 82 | 2,3 | 1,2 | 2400.24 | 2400.15 | -4  | Hypothalamus      | 0.49  | 0.07 | 4 |
| Chromogranin B | 309-330             | (EERRPSPKESKEADVATVRLGE)   | 63 | 6   | 3   | 2482.30 | 2482.28 | -11 | Hippocampus       | 1.11  |      | 1 |
| Chromogranin B | 309-330             | (EERRPSPKESKEADVATVRLGE)   | 63 | 6   | 3   | 2482.30 | 2482.28 | -11 | Prefrontal cortex | 1.09  | 0.15 | 2 |
| Chromogranin B | 64-86               | SGKEVKGEEKGENQNSKFEVRLL    | 57 | 5,6 | 4,5 | 2604.30 | 2604.35 | 6   | Amygdala          | <0.10 |      | 3 |
| Chromogranin B | 64-86               | SGKEVKGEEKGENQNSKFEVRLL    | 57 | 5,6 | 4,5 | 2604.30 | 2604.35 | 6   | Hippocampus       | <0.10 |      | 3 |
| Chromogranin B | 64-86               | SGKEVKGEEKGENQNSKFEVRLL    | 57 | 5,6 | 4,5 | 2604.30 | 2604.35 | 6   | Hypothalamus      | <0.10 |      | 3 |
| Chromogranin B | 64-86               | SGKEVKGEEKGENQNSKFEVRLL    | 57 | 5,6 | 4,5 | 2604.30 | 2604.35 | 6   | Prefrontal cortex | <0.10 |      | 2 |

|                    |             |                         |    |     |     |         |         |     |                   |       |      |   |
|--------------------|-------------|-------------------------|----|-----|-----|---------|---------|-----|-------------------|-------|------|---|
| Chromogranin B     | 64-86       | SGKEVKGEEKGENQNSKFEVRL  | 57 | 5,6 | 4,5 | 2604.30 | 2604.35 | 6   | Striatum          | <0.10 |      | 3 |
| Chromogranin B     | 64-86       | SGKEVKGEEKGENQNSKFEVRL  | 57 | 5,6 | 4,5 | 2604.30 | 2604.35 | 6   | Thalamus          | <0.10 |      | 3 |
| Procholecystokinin | 56-63       | ARLGALLA                | 61 | 2   | 1   | 783.49  | 783.50  | -28 | Amygdala          | <0.10 |      | 3 |
| Procholecystokinin | 56-63       | ARLGALLA                | 61 | 2   | 1   | 783.49  | 783.50  | -28 | Prefrontal cortex | <0.10 |      | 3 |
| Procholecystokinin | 52-62       | (GEPRARLGALL)           | 55 | 3   | 1   | 1151.60 | 1151.68 | 8   | Hippocampus       | 1.01  | 0.17 | 3 |
| Procholecystokinin | 52-62       | (GEPRARLGALL)           | 55 | 3   | 1   | 1151.60 | 1151.68 | 8   | Prefrontal cortex | 1.02  | 0.01 | 2 |
| Procholecystokinin | 52-62       | (GEPRARLGALL)           | 55 | 3   | 1   | 1151.60 | 1151.68 | 8   | Striatum          | 0.87  | 0.15 | 3 |
| Procholecystokinin | 52-62       | (GEPRARLGALL)           | 55 | 3   | 1   | 1151.60 | 1151.68 | 8   | Thalamus          | 0.77  | 0.20 | 3 |
| Procholecystokinin | 46-58 amide | (AVLRTDGEPRARL-amide)   | 51 | 4   | 1   | 1451.81 | 1451.82 | 34  | Amygdala          | 1.05  | 0.06 | 2 |
| Procholecystokinin | 46-58 amide | (AVLRTDGEPRARL-amide)   | 51 | 4   | 1   | 1451.81 | 1451.82 | 34  | Hippocampus       | 0.87  | 0.20 | 3 |
| Procholecystokinin | 46-58 amide | (AVLRTDGEPRARL-amide)   | 51 | 4   | 1   | 1451.81 | 1451.82 | 34  | Prefrontal cortex | 0.92  | 0.09 | 3 |
| Procholecystokinin | 46-58 amide | (AVLRTDGEPRARL-amide)   | 51 | 4   | 1   | 1451.81 | 1451.82 | 34  | Striatum          | 1.18  | 0.06 | 2 |
| Procholecystokinin | 46-58 amide | (AVLRTDGEPRARL-amide)   | 51 | 4   | 1   | 1451.81 | 1451.82 | 34  | Thalamus          | 0.92  | 0.11 | 2 |
| Procholecystokinin | 43-55       | (QLRAVLRTDGEPR)         | 52 | 4   | 1   | 1509.84 | 1509.84 | 36  | Amygdala          | 0.87  | 0.19 | 2 |
| Procholecystokinin | 43-55       | (QLRAVLRTDGEPR)         | 52 | 4   | 1   | 1509.84 | 1509.84 | 36  | Hippocampus       | 1.08  | 0.04 | 2 |
| Procholecystokinin | 43-55       | (QLRAVLRTDGEPR)         | 52 | 4   | 1   | 1509.84 | 1509.84 | 36  | Prefrontal cortex | 0.66  | 0.06 | 2 |
| Procholecystokinin | 43-55       | (QLRAVLRTDGEPR)         | 52 | 4   | 1   | 1509.84 | 1509.84 | 36  | Striatum          | 1.01  | 0.18 | 3 |
| Procholecystokinin | 43-55       | (QLRAVLRTDGEPR)         | 52 | 4   | 1   | 1509.84 | 1509.84 | 36  | Thalamus          | 0.63  |      | 1 |
| Procholecystokinin | 46-60       | AVLRTDGEPRARLGA         | 52 | 4   | 1   | 1580.89 | 1580.88 | 25  | Amygdala          | 0.91  | 0.25 | 3 |
| Procholecystokinin | 46-60       | AVLRTDGEPRARLGA         | 52 | 4   | 1   | 1580.89 | 1580.88 | 25  | Hippocampus       | 1.12  |      | 1 |
| Procholecystokinin | 46-60       | AVLRTDGEPRARLGA         | 52 | 4   | 1   | 1580.89 | 1580.88 | 25  | Prefrontal cortex | 1.21  | 0.23 | 3 |
| Procholecystokinin | 46-60       | AVLRTDGEPRARLGA         | 52 | 4   | 1   | 1580.89 | 1580.88 | 25  | Striatum          | 1.14  | 0.15 | 3 |
| Procholecystokinin | 46-60       | AVLRTDGEPRARLGA         | 52 | 4   | 1   | 1580.89 | 1580.88 | 25  | Thalamus          | 0.85  |      | 1 |
| Procholecystokinin | 46-61       | AVLRTDGEPRARLGAL        | 57 | 4   | 1   | 1693.95 | 1693.97 | 30  | Amygdala          | 0.85  | 0.19 | 3 |
| Procholecystokinin | 46-61       | AVLRTDGEPRARLGAL        | 57 | 4   | 1   | 1693.95 | 1693.97 | 30  | Hippocampus       | 0.91  | 0.30 | 3 |
| Procholecystokinin | 46-61       | AVLRTDGEPRARLGAL        | 57 | 4   | 1   | 1693.95 | 1693.97 | 30  | Prefrontal cortex | 1.10  | 0.17 | 3 |
| Procholecystokinin | 46-61       | AVLRTDGEPRARLGAL        | 57 | 4   | 1   | 1693.95 | 1693.97 | 30  | Striatum          | 1.04  | 0.31 | 2 |
| Procholecystokinin | 46-61       | AVLRTDGEPRARLGAL        | 57 | 4   | 1   | 1693.95 | 1693.97 | 30  | Thalamus          | 0.99  | 0.29 | 3 |
| Procholecystokinin | 46-62       | AVLRTDGEPRARLGALL       | 60 | 4   | 1   | 1807.00 | 1807.04 | 8   | Amygdala          | 1.00  | 0.14 | 3 |
| Procholecystokinin | 46-62       | AVLRTDGEPRARLGALL       | 60 | 4   | 1   | 1807.00 | 1807.04 | 8   | Hippocampus       | 0.87  | 0.19 | 3 |
| Procholecystokinin | 46-62       | AVLRTDGEPRARLGALL       | 60 | 4   | 1   | 1807.00 | 1807.04 | 8   | Hypothalamus      | 0.98  | 0.22 | 3 |
| Procholecystokinin | 46-62       | AVLRTDGEPRARLGALL       | 60 | 4   | 1   | 1807.00 | 1807.04 | 8   | Prefrontal cortex | 1.18  | 0.28 | 3 |
| Procholecystokinin | 46-62       | AVLRTDGEPRARLGALL       | 60 | 4   | 1   | 1807.00 | 1807.04 | 8   | Striatum          | 0.99  | 0.28 | 2 |
| Procholecystokinin | 46-62       | AVLRTDGEPRARLGALL       | 60 | 4   | 1   | 1807.00 | 1807.04 | 8   | Thalamus          | 0.88  | 0.21 | 2 |
| Procholecystokinin | 46-63       | AVLRTDGEPRARLGALLA      | 60 | 4   | 1   | 1878.06 | 1878.08 | 11  | Amygdala          | 0.70  | 0.25 | 3 |
| Procholecystokinin | 46-63       | AVLRTDGEPRARLGALLA      | 60 | 4   | 1   | 1878.06 | 1878.08 | 11  | Hippocampus       | 0.87  | 0.11 | 2 |
| Procholecystokinin | 46-63       | AVLRTDGEPRARLGALLA      | 60 | 4   | 1   | 1878.06 | 1878.08 | 11  | Hypothalamus      | 0.67  | 0.18 | 3 |
| Procholecystokinin | 46-63       | AVLRTDGEPRARLGALLA      | 60 | 4   | 1   | 1878.06 | 1878.08 | 11  | Prefrontal cortex | 0.84  | 0.23 | 3 |
| Procholecystokinin | 46-63       | AVLRTDGEPRARLGALLA      | 60 | 4   | 1   | 1878.06 | 1878.08 | 11  | Striatum          | 0.78  | 0.13 | 3 |
| Procholecystokinin | 46-63       | AVLRTDGEPRARLGALLA      | 60 | 4   | 1   | 1878.06 | 1878.08 | 11  | Thalamus          | 0.86  |      | 1 |
| Procholecystokinin | 43-60       | (QLRAVLRTDGEPRARLGA)    | 51 | 5,6 | 1   | 1978.22 | 1978.12 | 9   | Amygdala          | <0.10 |      | 3 |
| Procholecystokinin | 43-60       | (QLRAVLRTDGEPRARLGA)    | 51 | 5,6 | 1   | 1978.22 | 1978.12 | 9   | Hippocampus       | <0.10 |      | 1 |
| Procholecystokinin | 43-60       | (QLRAVLRTDGEPRARLGA)    | 51 | 5,6 | 1   | 1978.22 | 1978.12 | 9   | Hypothalamus      | <0.10 |      | 3 |
| Procholecystokinin | 43-60       | (QLRAVLRTDGEPRARLGA)    | 51 | 5,6 | 1   | 1978.22 | 1978.12 | 9   | Prefrontal cortex | <0.10 |      | 2 |
| Procholecystokinin | 43-60       | (QLRAVLRTDGEPRARLGA)    | 51 | 5,6 | 1   | 1978.22 | 1978.12 | 9   | Thalamus          | <0.10 |      | 2 |
| Procholecystokinin | 72-93       | (APSGRMSVLKLNQLDPSHRIS) | 62 | 5   | 2   | 2392.19 | 2392.26 | -8  | Amygdala          | <0.10 |      | 1 |
| Procholecystokinin | 72-93       | (APSGRMSVLKLNQLDPSHRIS) | 62 | 5   | 2   | 2392.19 | 2392.26 | -8  | Hippocampus       | <0.10 |      | 3 |

|                    |                    |                                  |    |     |     |         |         |     |                   |       |      |   |
|--------------------|--------------------|----------------------------------|----|-----|-----|---------|---------|-----|-------------------|-------|------|---|
| Procholecystokinin | 72-93              | (APSGRMSVLKLNQLSDPSHRIS)         | 62 | 5   | 2   | 2392.19 | 2392.26 | -8  | Prefrontal cortex | <0.10 |      | 3 |
| Procholecystokinin | 72-94              | APSGRMSVLKLNQLSDPSHRISD          | 62 | 4,5 | 2   | 2507.29 | 2507.29 | 9   | Amygdala          | <0.10 |      | 3 |
| Procholecystokinin | 72-94              | APSGRMSVLKLNQLSDPSHRISD          | 62 | 4,5 | 2   | 2507.29 | 2507.29 | 9   | Hippocampus       | <0.10 |      | 3 |
| Procholecystokinin | 72-94              | APSGRMSVLKLNQLSDPSHRISD          | 62 | 4,5 | 2   | 2507.29 | 2507.29 | 9   | Prefrontal cortex | <0.10 |      | 3 |
| Procholecystokinin | 71-94              | KAPSGRMSVLKLNQLSDPSHRISD         | 60 | 5,6 | 3   | 2635.42 | 2635.39 | -18 | Amygdala          | 0.45  | 0.02 | 3 |
| Procholecystokinin | 71-94              | KAPSGRMSVLKLNQLSDPSHRISD         | 60 | 5,6 | 3   | 2635.42 | 2635.39 | -18 | Hippocampus       | 0.41  | 0.03 | 2 |
| Procholecystokinin | 71-94              | KAPSGRMSVLKLNQLSDPSHRISD         | 60 | 5,6 | 3   | 2635.42 | 2635.39 | -18 | Prefrontal cortex | 0.39  | 0.10 | 3 |
| Procholecystokinin | 46-69              | (AVLRTDGEPRARLGALLARYIQQV)       | 69 | 4,5 | 1   | 2665.51 | 2665.51 | 9   | Amygdala          | <0.10 |      | 3 |
| Procholecystokinin | 46-69              | (AVLRTDGEPRARLGALLARYIQQV)       | 69 | 4,5 | 1   | 2665.51 | 2665.51 | 9   | Hippocampus       | <0.10 |      | 3 |
| Procholecystokinin | 46-69              | (AVLRTDGEPRARLGALLARYIQQV)       | 69 | 4,5 | 1   | 2665.51 | 2665.51 | 9   | Prefrontal cortex | <0.10 |      | 3 |
| Procholecystokinin | 46-69              | (AVLRTDGEPRARLGALLARYIQQV)       | 69 | 4,5 | 1   | 2665.51 | 2665.51 | 9   | Thalamus          | <0.10 |      | 2 |
| Procholecystokinin | 65-94              | (YIQQVRKAPSGRMSVLKLNQLSDPSHRISD) | 61 | 7   | 3   | 3422.70 | 3422.82 | -18 | Prefrontal cortex | 1.45  | 0.19 | 3 |
| Prodynorphin       | Dynorphin A8       | YGGFLRRI                         | 60 | 3   | 1   | 980.56  | 980.56  | 9   | Amygdala          | <0.10 |      | 3 |
| Prodynorphin       | Dynorphin A8       | YGGFLRRI                         | 60 | 3   | 1   | 980.56  | 980.56  | 9   | Hippocampus       | <0.10 |      | 3 |
| Prodynorphin       | Dynorphin A8       | YGGFLRRI                         | 60 | 3   | 1   | 980.56  | 980.56  | 9   | Hypothalamus      | <0.10 |      | 4 |
| Prodynorphin       | Dynorphin A8       | YGGFLRRI                         | 60 | 3   | 1   | 980.56  | 980.56  | 9   | Prefrontal cortex | <0.10 |      | 3 |
| Prodynorphin       | Dynorphin A8       | YGGFLRRI                         | 60 | 3   | 1   | 980.56  | 980.56  | 9   | Striatum          | <0.10 |      | 3 |
| Prodynorphin       | Dynorphin A8       | YGGFLRRI                         | 60 | 3   | 1   | 980.56  | 980.56  | 9   | Thalamus          | <0.10 |      | 3 |
| Prodynorphin       | Dynorphin A10-17   | PKLKWDNQ                         | 54 | 3   | 3   | 1027.61 | 1027.55 | 8   | Amygdala          | <0.10 |      | 3 |
| Prodynorphin       | Dynorphin A10-17   | PKLKWDNQ                         | 54 | 3   | 3   | 1027.61 | 1027.55 | 8   | Hippocampus       | <0.10 |      | 1 |
| Prodynorphin       | Dynorphin A10-17   | PKLKWDNQ                         | 54 | 3   | 3   | 1027.61 | 1027.55 | 8   | Prefrontal cortex | <0.10 |      | 2 |
| Prodynorphin       | Dynorphin A10-17   | PKLKWDNQ                         | 54 | 3   | 3   | 1027.61 | 1027.55 | 8   | Thalamus          | <0.10 |      | 1 |
| Prodynorphin       | Beta-neoendorphin  | YGGFLRKYP                        | 58 | 3   | 2   | 1099.62 | 1099.58 | 4   | Hypothalamus      | 0.83  | 0.07 | 4 |
| Prodynorphin       | Beta-neoendorphin  | YGGFLRKYP                        | 58 | 3   | 2   | 1099.62 | 1099.58 | 4   | Thalamus          | 0.83  |      | 1 |
| Prodynorphin       | Alpha-neoendorphin | YGGFLRKYPK                       | 55 | 4   | 2,3 | 1227.66 | 1227.68 | -6  | Amygdala          | 0.36  | 0.11 | 3 |
| Prodynorphin       | Alpha-neoendorphin | YGGFLRKYPK                       | 55 | 4   | 2,3 | 1227.66 | 1227.68 | -6  | Hippocampus       | 0.19  | 0.08 | 3 |
| Prodynorphin       | Alpha-neoendorphin | YGGFLRKYPK                       | 55 | 4   | 2,3 | 1227.66 | 1227.68 | -6  | Hypothalamus      | 0.58  | 0.12 | 4 |
| Prodynorphin       | Alpha-neoendorphin | YGGFLRKYPK                       | 55 | 4   | 2,3 | 1227.66 | 1227.68 | -6  | Prefrontal cortex | 0.34  | 0.06 | 3 |
| Prodynorphin       | Alpha-neoendorphin | YGGFLRKYPK                       | 55 | 4   | 2,3 | 1227.66 | 1227.68 | -6  | Striatum          | 0.22  | 0.07 | 3 |
| Prodynorphin       | Alpha-neoendorphin | YGGFLRKYPK                       | 55 | 4   | 2,3 | 1227.66 | 1227.68 | -6  | Thalamus          | 0.21  | 0.04 | 3 |
| Prodynorphin       | Dynorphin B13      | (YGGFLRRQFKVVT)                  | 60 | 4   | 1,2 | 1569.89 | 1569.88 | -13 | Amygdala          | <0.10 |      | 3 |
| Prodynorphin       | Dynorphin B13      | (YGGFLRRQFKVVT)                  | 60 | 4   | 1,2 | 1569.89 | 1569.88 | -13 | Hippocampus       | <0.10 |      | 1 |
| Prodynorphin       | Dynorphin B13      | (YGGFLRRQFKVVT)                  | 60 | 4   | 1,2 | 1569.89 | 1569.88 | -13 | Hypothalamus      | <0.10 |      | 3 |
| Prodynorphin       | Dynorphin B13      | (YGGFLRRQFKVVT)                  | 60 | 4   | 1,2 | 1569.89 | 1569.88 | -13 | Prefrontal cortex | <0.10 |      | 3 |
| Prodynorphin       | Dynorphin B13      | (YGGFLRRQFKVVT)                  | 60 | 4   | 1,2 | 1569.89 | 1569.88 | -13 | Thalamus          | <0.10 |      | 3 |
| Prodynorphin       | Dynorphin A17      | (YGGFLRRIRPKLKWDNQ)              | 58 | 6   | 3   | 2146.10 | 2146.19 | 2   | Hippocampus       | <0.10 |      | 1 |
| Prodynorphin       | Dynorphin A17      | (YGGFLRRIRPKLKWDNQ)              | 58 | 6   | 3   | 2146.10 | 2146.19 | 2   | Thalamus          | <0.10 |      | 1 |
| Proenkephalin      | Leu-Enkephalin     | YGGFL                            | 67 | 1   | 1   | 555.25  | 555.27  | -11 | Amygdala          | <0.10 |      | 3 |
| Proenkephalin      | Leu-Enkephalin     | YGGFL                            | 67 | 1   | 1   | 555.25  | 555.27  | -11 | Striatum          | <0.10 |      | 3 |
| Proenkephalin      | Heptapeptide       | YGGFMRF                          | 65 | 2   | 1   | 876.38  | 876.40  | -6  | Amygdala          | 0.42  | 0.12 | 3 |
| Proenkephalin      | Heptapeptide       | YGGFMRF                          | 65 | 2   | 1   | 876.38  | 876.40  | -6  | Hippocampus       | 0.34  | 0.15 | 3 |
| Proenkephalin      | Heptapeptide       | YGGFMRF                          | 65 | 2   | 1   | 876.38  | 876.40  | -6  | Hypothalamus      | 0.53  | 0.07 | 4 |
| Proenkephalin      | Heptapeptide       | YGGFMRF                          | 65 | 2   | 1   | 876.38  | 876.40  | -6  | Prefrontal cortex | 0.69  | 0.09 | 3 |
| Proenkephalin      | Heptapeptide       | YGGFMRF                          | 65 | 2   | 1   | 876.38  | 876.40  | -6  | Striatum          | 0.20  | 0.02 | 2 |
| Proenkephalin      | Heptapeptide       | YGGFMRF                          | 65 | 2   | 1   | 876.38  | 876.40  | -6  | Thalamus          | 0.24  | 0.01 | 2 |
| Proenkephalin      | Octapeptide        | YGGFMRSLS                        | 63 | 2   | 1   | 929.42  | 929.45  | -13 | Amygdala          | <0.10 |      | 3 |
| Proenkephalin      | Octapeptide        | YGGFMRSLS                        | 63 | 2   | 1   | 929.42  | 929.45  | -13 | Hippocampus       | <0.10 |      | 3 |

|                                  |                        |                                 |    |     |     |         |         |     |                   |       |      |   |
|----------------------------------|------------------------|---------------------------------|----|-----|-----|---------|---------|-----|-------------------|-------|------|---|
| Proenkephalin                    | Octapeptide            | YGGFMRSLS                       | 63 | 2   | 1   | 929.42  | 929.45  | -13 | Hypothalamus      | <0.10 |      | 3 |
| Proenkephalin                    | Octapeptide            | YGGFMRSLS                       | 63 | 2   | 1   | 929.42  | 929.45  | -13 | Striatum          | <0.10 |      | 3 |
| Proenkephalin                    | Octapeptide            | YGGFMRSLS                       | 63 | 2   | 1   | 929.42  | 929.45  | -13 | Thalamus          | <0.10 |      | 3 |
| Proenkephalin                    | Metorphamide           | YGGFMRRV-amide                  | 55 | 3   | 1   | 983.50  | 983.50  | 24  | Thalamus          | <0.10 |      | 1 |
| Proenkephalin                    | Metorphamide precursor | YGGFMRRVGR                      | 53 | 4   | 1   | 1197.60 | 1197.62 | 1   | Thalamus          | <0.10 |      | 1 |
| Proenkephalin                    | 197-208                | SPQLEDEAKELQ                    | 57 | 2,3 | 2   | 1385.74 | 1385.67 | -16 | Hypothalamus      | 0.74  | 0.07 | 4 |
| Proenkephalin                    | 218-228                | VGRPEWWMDYQ                     | 67 | 2   | 1   | 1465.63 | 1465.65 | 3   | Amygdala          | <0.10 |      | 3 |
| Proenkephalin                    | 218-228                | VGRPEWWMDYQ                     | 67 | 2   | 1   | 1465.63 | 1465.65 | 3   | Hippocampus       | <0.10 |      | 2 |
| Proenkephalin                    | 218-228                | VGRPEWWMDYQ                     | 67 | 2   | 1   | 1465.63 | 1465.65 | 3   | Hypothalamus      | <0.10 |      | 4 |
| Proenkephalin                    | 218-228                | VGRPEWWMDYQ                     | 67 | 2   | 1   | 1465.63 | 1465.65 | 3   | Prefrontal cortex | <0.10 |      | 2 |
| Proenkephalin                    | 218-228                | VGRPEWWMDYQ                     | 67 | 2   | 1   | 1465.63 | 1465.65 | 3   | Striatum          | <0.10 |      | 3 |
| Proenkephalin                    | 218-228                | VGRPEWWMDYQ                     | 67 | 2   | 1   | 1465.63 | 1465.65 | 3   | Thalamus          | <0.10 |      | 3 |
| Proenkephalin                    | 238-261                | FAESLPSDEEGENYSKEVPEIE          | 66 | 3   | 2   | 2497.19 | 2497.10 | -14 | Hypothalamus      | 0.55  | 0.07 | 3 |
| Proenkephalin                    | 238-261 + phosphate    | FAESLP-phosphoS-DEEGENYSKEVPEIE | 68 | 2,3 | 1,2 | 2577.11 | 2577.06 | 22  | Hypothalamus      | 0.57  | 0.07 | 4 |
| Progastrin releasing peptide     | 43-52 amide            | (GSHWAVGHLM-amide)              | 58 | 3   | 1   | 1092.52 | 1092.51 | -5  | Prefrontal cortex | <0.10 |      | 2 |
| Progastrin releasing peptide     | 24-41                  | (APVSTGAGGGTVLAKMYP)            | 80 | 2   | 2   | 1675.89 | 1675.86 | -35 | Hypothalamus      | 1.04  | 0.14 | 2 |
| Prohormone convertase 1          | 619-628                | GVEKMVNVE                       | 59 | 2   | 2   | 1102.64 | 1102.57 | -1  | Hypothalamus      | <0.10 |      | 3 |
| Prohormone convertase 1          | 90-108                 | LSDDDRVTWAEQQYEKERS             | 59 | 4   | 2   | 2354.25 | 2354.07 | 26  | Hippocampus       | 0.97  |      | 1 |
| Prohormone convertase 1          | 90-108                 | LSDDDRVTWAEQQYEKERS             | 59 | 4   | 2   | 2354.25 | 2354.07 | 26  | Hypothalamus      | 1.01  | 0.24 | 3 |
| Prohormone convertase 2          | C-terminal fragment    | SLQSILRKN                       | 57 | 3   | 2   | 1057.60 | 1057.62 | 5   | Amygdala          | <0.10 |      | 3 |
| Prohormone convertase 2          | C-terminal fragment    | SLQSILRKN                       | 57 | 3   | 2   | 1057.60 | 1057.62 | 5   | Hippocampus       | <0.10 |      | 3 |
| Prohormone convertase 2          | C-terminal fragment    | SLQSILRKN                       | 57 | 3   | 2   | 1057.60 | 1057.62 | 5   | Hypothalamus      | <0.10 |      | 2 |
| Prohormone convertase 2          | C-terminal fragment    | SLQSILRKN                       | 57 | 3   | 2   | 1057.60 | 1057.62 | 5   | Prefrontal cortex | <0.10 |      | 3 |
| Prohormone convertase 2          | C-terminal fragment    | SLQSILRKN                       | 57 | 3   | 2   | 1057.60 | 1057.62 | 5   | Striatum          | <0.10 |      | 3 |
| Prohormone convertase 2          | C-terminal fragment    | SLQSILRKN                       | 57 | 3   | 2   | 1057.60 | 1057.62 | 5   | Thalamus          | <0.10 |      | 3 |
| Prohormone convertase 2          | 94-104                 | IKMALQQEGFD                     | 63 | 2   | 2   | 1278.69 | 1278.64 | -22 | Amygdala          | <0.10 |      | 2 |
| Prohormone convertase 2          | 94-104                 | IKMALQQEGFD                     | 63 | 2   | 2   | 1278.69 | 1278.64 | -22 | Hippocampus       | <0.10 |      | 1 |
| Prohormone convertase 2          | 94-104                 | IKMALQQEGFD                     | 63 | 2   | 2   | 1278.69 | 1278.64 | -22 | Hypothalamus      | <0.10 |      | 2 |
| Prohormone convertase 2          | 94-104                 | IKMALQQEGFD                     | 63 | 2   | 2   | 1278.69 | 1278.64 | -22 | Prefrontal cortex | <0.10 |      | 2 |
| Prohormone convertase 2          | C-terminal fragment    | pyroE-ELEEELDEAVERSLSILRKN      | 89 | 3   | 1   | 2610.50 | 2610.31 | 22  | Hypothalamus      | <0.10 |      | 4 |
| Promelanin concentrating hormone | Neuropeptide EI        | EIGDEENSAKFPI-amide             | 59 | 2,3 | 1,2 | 1446.74 | 1446.68 | 8   | Hippocampus       | <0.10 |      | 2 |
| Promelanin concentrating hormone | Neuropeptide EI        | EIGDEENSAKFPI-amide             | 59 | 2,3 | 1,2 | 1446.74 | 1446.68 | 8   | Hypothalamus      | <0.10 |      | 4 |
| Promelanin concentrating hormone | Neuropeptide EI        | EIGDEENSAKFPI-amide             | 59 | 2,3 | 1,2 | 1446.74 | 1446.68 | 8   | Prefrontal cortex | <0.10 |      | 2 |
| Proneurotensin                   | Neuromedin N           | KIPYIL                          | 63 | 2   | 1,2 | 745.44  | 745.47  | -15 | Amygdala          | 0.51  | 0.23 | 2 |
| Proneurotensin                   | Neuromedin N           | KIPYIL                          | 63 | 2   | 1,2 | 745.44  | 745.47  | -15 | Hippocampus       | 0.61  | 0.17 | 3 |
| Proneurotensin                   | Neuromedin N           | KIPYIL                          | 63 | 2   | 1,2 | 745.44  | 745.47  | -15 | Hypothalamus      | 0.64  | 0.17 | 4 |
| Proneurotensin                   | Neuromedin N           | KIPYIL                          | 63 | 2   | 1,2 | 745.44  | 745.47  | -15 | Striatum          | 0.51  | 0.14 | 3 |
| Proneurotensin                   | Neuromedin N           | KIPYIL                          | 63 | 2   | 1,2 | 745.44  | 745.47  | -15 | Thalamus          | 0.55  | 0.10 | 2 |
| Proneurotensin                   | Neurotensin            | pELYENKPRRPYIL                  | 59 | 3   | 1   | 1671.93 | 1671.91 | 11  | Amygdala          | 1.18  | 0.23 | 3 |
| Proneurotensin                   | Neurotensin            | pELYENKPRRPYIL                  | 59 | 3   | 1   | 1671.93 | 1671.91 | 11  | Hypothalamus      | 0.74  | 0.10 | 4 |
| Proneurotensin                   | Neurotensin            | pELYENKPRRPYIL                  | 59 | 3   | 1   | 1671.93 | 1671.91 | 11  | Striatum          | 0.75  | 0.10 | 2 |
| Proneurotensin                   | Neurotensin            | pELYENKPRRPYIL                  | 59 | 3   | 1   | 1671.93 | 1671.91 | 11  | Thalamus          | 0.68  | 0.13 | 2 |
| Pronociceptin/orphanin FQ        | Nociceptin             | FGGFTGARKSARKLANQ               | 54 | 4,5 | 3   | 1808.07 | 1807.98 | 17  | Amygdala          | 0.48  | 0.21 | 3 |
| Pronociceptin/orphanin FQ        | Nociceptin             | FGGFTGARKSARKLANQ               | 54 | 4,5 | 3   | 1808.07 | 1807.98 | 17  | Hippocampus       | <0.10 |      | 1 |
| Pronociceptin/orphanin FQ        | Nociceptin             | FGGFTGARKSARKLANQ               | 54 | 4,5 | 3   | 1808.07 | 1807.98 | 17  | Prefrontal cortex | <0.10 |      | 3 |
| Pronociceptin/orphanin FQ        | Nociceptin             | FGGFTGARKSARKLANQ               | 54 | 4,5 | 3   | 1808.07 | 1807.98 | 17  | Thalamus          | 0.31  |      | 1 |
| ProNPY                           | C-terminal region      | SSPETLISDLLMKESTENAPRTRLEDPSMW  | 76 | 4   | 2   | 3432.57 | 3432.65 | -3  | Amygdala          | 1.01  | 0.04 | 2 |

|                             |                      |                                     |    |     |     |         |         |     |                   |       |      |   |
|-----------------------------|----------------------|-------------------------------------|----|-----|-----|---------|---------|-----|-------------------|-------|------|---|
| ProNPY                      | C-terminal region    | SSPETLISDLLMKESTENAPRTRLEDPSMW      | 76 | 4   | 2   | 3432.57 | 3432.65 | -3  | Hippocampus       | 0.79  | 0.12 | 3 |
| ProNPY                      | C-terminal region    | SSPETLISDLLMKESTENAPRTRLEDPSMW      | 76 | 4   | 2   | 3432.57 | 3432.65 | -3  | Hypothalamus      | 1.07  | 0.16 | 4 |
| ProNPY                      | C-terminal region    | SSPETLISDLLMKESTENAPRTRLEDPSMW      | 76 | 4   | 2   | 3432.57 | 3432.65 | -3  | Prefrontal cortex | 0.44  | 0.05 | 2 |
| ProNPY                      | C-terminal region    | SSPETLISDLLMKESTENAPRTRLEDPSMW      | 76 | 4   | 2   | 3432.57 | 3432.65 | -3  | Striatum          | 0.83  | 0.28 | 3 |
| ProNPY                      | C-terminal region    | SSPETLISDLLMKESTENAPRTRLEDPSMW      | 76 | 4   | 2   | 3432.57 | 3432.65 | -3  | Thalamus          | 0.88  | 0.28 | 3 |
| ProNPY                      | NPY                  | (YPSKPDNPGEDAPAEDMARYYSALRHYINLITRC | 72 | 7   | 2   | 4271.58 | 4271.73 | -42 | Prefrontal cortex | 0.43  | 0.08 | 2 |
| Proopiomelanocortin         | Des-acetyl-MSH       | SYSMEHFRWGKPV-amide                 | 57 | 4   | 1   | 1621.92 | 1621.77 | 38  | Hypothalamus      | <0.10 |      | 4 |
| Proopiomelanocortin         | Alpha-MSH            | Ac-SYSMEHFRWGKPV-amide              | 60 | 2,3 | 1   | 1663.86 | 1663.79 | -6  | Hypothalamus      | <0.10 |      | 4 |
| Proopiomelanocortin         | Alpha-MSH (oxidized) | Ac-SYS-Mox-EHFRWGKPV-amide          | 58 | 3   | 1   | 1679.93 | 1679.80 | 22  | Hypothalamus      | <0.10 |      | 2 |
| Proopiomelanocortin         | J-peptide            | AEEEEAVWGDGSPSPRE-amide             | 57 | 2,3 | 1   | 1940.01 | 1939.86 | 22  | Hypothalamus      | 0.37  | 0.01 | 3 |
| Proopiomelanocortin         | CLIP                 | RPVKVYPNVAENESAFAFPLEF              | 68 | 3   | 1,2 | 2505.43 | 2505.26 | 12  | Hypothalamus      | <0.10 |      | 4 |
| Proopiomelanocortin         | CLIP + phosphate     | RPVKVYPNVAENE-phosphoS-AEAFPLEF     | 71 | 3   | 2   | 2585.42 | 2585.23 | 20  | Hypothalamus      | <0.10 |      | 2 |
| Proopiomelanocortin         | 165-189              | (ELEGERPLGLEQVLESDAEKDDGPY)         | 85 | 2   | 2   | 2787.50 | 2787.31 | 1   | Hypothalamus      | 0.52  | 0.10 | 4 |
| Propeptidyl-amidating-monoo | Cleaved pro peptide  | FRSPLSVF                            | 68 | 2   | 1   | 951.49  | 951.53  | -14 | Amygdala          | 0.94  | 0.12 | 2 |
| Propeptidyl-amidating-monoo | Cleaved pro peptide  | FRSPLSVF                            | 68 | 2   | 1   | 951.49  | 951.53  | -14 | Hippocampus       | 0.73  | 0.08 | 3 |
| Propeptidyl-amidating-monoo | Cleaved pro peptide  | FRSPLSVF                            | 68 | 2   | 1   | 951.49  | 951.53  | -14 | Hypothalamus      | 0.79  | 0.12 | 4 |
| Propeptidyl-amidating-monoo | Cleaved pro peptide  | FRSPLSVF                            | 68 | 2   | 1   | 951.49  | 951.53  | -14 | Prefrontal cortex | 0.92  | 0.23 | 3 |
| Propeptidyl-amidating-monoo | Cleaved pro peptide  | FRSPLSVF                            | 68 | 2   | 1   | 951.49  | 951.53  | -14 | Striatum          | 0.80  | 0.18 | 2 |
| Propeptidyl-amidating-monoo | Cleaved pro peptide  | FRSPLSVF                            | 68 | 2   | 1   | 951.49  | 951.53  | -14 | Thalamus          | 0.77  | 0.32 | 2 |
| ProSAAS                     | Little SAAS 5-18     | ASAPLVETSTPLRL                      | 65 | 2   | 1   | 1453.85 | 1453.81 | 6   | Hypothalamus      | 0.86  | 0.13 | 4 |
| ProSAAS                     | Little SAAS 5-18     | ASAPLVETSTPLRL                      | 65 | 2   | 1   | 1453.85 | 1453.81 | 9   | Thalamus          | 0.74  | 0.08 | 2 |
| ProSAAS                     | Little SAAS 1-16     | SLSAASAPLVETSTPL                    | 67 | 2   | 1   | 1542.80 | 1542.81 | 1   | Amygdala          | 1.03  | 0.09 | 3 |
| ProSAAS                     | Little SAAS 1-16     | SLSAASAPLVETSTPL                    | 67 | 2   | 1   | 1542.80 | 1542.81 | 1   | Hippocampus       | 1.15  | 0.29 | 3 |
| ProSAAS                     | Little SAAS 1-16     | SLSAASAPLVETSTPL                    | 67 | 2   | 1   | 1542.80 | 1542.81 | 1   | Hypothalamus      | 0.90  | 0.14 | 4 |
| ProSAAS                     | Little SAAS 1-16     | SLSAASAPLVETSTPL                    | 67 | 2   | 1   | 1542.80 | 1542.81 | 1   | Prefrontal cortex | 0.87  |      | 1 |
| ProSAAS                     | Little SAAS 1-16     | SLSAASAPLVETSTPL                    | 67 | 2   | 1   | 1542.80 | 1542.81 | 1   | Striatum          | 0.89  | 0.18 | 3 |
| ProSAAS                     | Little SAAS 1-16     | SLSAASAPLVETSTPL                    | 67 | 2   | 1   | 1542.80 | 1542.81 | 1   | Thalamus          | 0.84  | 0.23 | 3 |
| ProSAAS                     | Big LEN 1-15         | (LENPSPQAPARRLLP)                   | 58 | 3   | 1   | 1657.96 | 1657.93 | 6   | Hypothalamus      | 0.82  | 0.10 | 4 |
| ProSAAS                     | Big LEN 1-15         | (LENPSPQAPARRLLP)                   | 58 | 3   | 1   | 1657.96 | 1657.93 | 6   | Thalamus          | 0.75  | 0.09 | 2 |
| ProSAAS                     | Big LEN              | LENPSPQAPARRLLPP                    | 58 | 3   | 1   | 1754.97 | 1754.98 | 9   | Amygdala          | 0.88  | 0.14 | 3 |
| ProSAAS                     | Big LEN              | LENPSPQAPARRLLPP                    | 58 | 3   | 1   | 1754.97 | 1754.98 | 9   | Hippocampus       | 0.84  | 0.06 | 3 |
| ProSAAS                     | Big LEN              | LENPSPQAPARRLLPP                    | 58 | 3   | 1   | 1754.97 | 1754.98 | 9   | Hypothalamus      | 0.80  | 0.06 | 4 |
| ProSAAS                     | Big LEN              | LENPSPQAPARRLLPP                    | 58 | 3   | 1   | 1754.97 | 1754.98 | 9   | Prefrontal cortex | 0.84  | 0.18 | 2 |
| ProSAAS                     | Big LEN              | LENPSPQAPARRLLPP                    | 58 | 3   | 1   | 1754.97 | 1754.98 | 9   | Striatum          | 0.65  | 0.09 | 3 |
| ProSAAS                     | Big LEN              | LENPSPQAPARRLLPP                    | 58 | 3   | 1   | 1754.97 | 1754.98 | 9   | Thalamus          | 0.74  | 0.14 | 3 |
| ProSAAS                     | Little SAAS          | SLSAASAPLVETSTPLRL                  | 68 | 2,3 | 1   | 1811.96 | 1812.01 | -5  | Amygdala          | 0.82  | 0.16 | 3 |
| ProSAAS                     | Little SAAS          | SLSAASAPLVETSTPLRL                  | 68 | 2,3 | 1   | 1811.96 | 1812.01 | -5  | Hippocampus       | 0.78  | 0.10 | 3 |
| ProSAAS                     | Little SAAS          | SLSAASAPLVETSTPLRL                  | 68 | 2,3 | 1   | 1811.96 | 1812.01 | -5  | Hypothalamus      | 0.81  | 0.12 | 4 |
| ProSAAS                     | Little SAAS          | SLSAASAPLVETSTPLRL                  | 68 | 2,3 | 1   | 1811.96 | 1812.01 | -5  | Prefrontal cortex | 0.87  | 0.14 | 3 |
| ProSAAS                     | Little SAAS          | SLSAASAPLVETSTPLRL                  | 68 | 2,3 | 1   | 1811.96 | 1812.01 | -5  | Striatum          | 0.78  | 0.15 | 3 |
| ProSAAS                     | Little SAAS          | SLSAASAPLVETSTPLRL                  | 68 | 2,3 | 1   | 1811.96 | 1812.01 | -5  | Thalamus          | 0.68  | 0.20 | 3 |
| ProSAAS                     | PEN-20               | SVDQDLGPEVPPENVLGALL                | 82 | 2   | 1   | 2061.30 | 2061.06 | 6   | Hypothalamus      | 0.87  |      | 1 |
| ProSAAS                     | PEN                  | SVDQDLGPEVPPENVLGALLRV              | 82 | 2,3 | 1   | 2316.37 | 2316.23 | -4  | Amygdala          | 0.97  | 0.06 | 2 |
| ProSAAS                     | PEN                  | SVDQDLGPEVPPENVLGALLRV              | 82 | 2,3 | 1   | 2316.37 | 2316.23 | -5  | Hypothalamus      | 0.76  | 0.08 | 4 |
| ProSAAS                     | Big SAAS 1-24        | ARPVKEPRSLAASAPLVETSTPL             | 59 | 4   | 2   | 2476.55 | 2476.37 | 23  | Hypothalamus      | 0.76  | 0.07 | 4 |
| ProSAAS                     | GAV 5-28             | GEAAGAVQELARALAHLLAEARQE            | 81 | 4   | 1   | 2531.32 | 2531.31 | -4  | Amygdala          | 0.91  | 0.11 | 3 |

|                                  |                             |                                   |    |     |     |         |         |     |                   |       |      |   |
|----------------------------------|-----------------------------|-----------------------------------|----|-----|-----|---------|---------|-----|-------------------|-------|------|---|
| ProSAAS                          | GAV 5-28                    | GEAAGAVQELARALAHLLLEAERQE         | 81 | 4   | 1   | 2531.32 | 2531.31 | -4  | Hippocampus       | 0.91  | 0.00 | 2 |
| ProSAAS                          | GAV 5-28                    | GEAAGAVQELARALAHLLLEAERQE         | 81 | 4   | 1   | 2531.32 | 2531.31 | -4  | Hypothalamus      | 0.92  | 0.10 | 4 |
| ProSAAS                          | GAV 5-28                    | GEAAGAVQELARALAHLLLEAERQE         | 81 | 4   | 1   | 2531.32 | 2531.31 | -4  | Striatum          | 0.91  |      | 1 |
| ProSAAS                          | GAV 5-28                    | GEAAGAVQELARALAHLLLEAERQE         | 81 | 4   | 1   | 2531.32 | 2531.31 | -4  | Thalamus          | 0.62  | 0.21 | 3 |
| ProSAAS                          | Big SAAS                    | ARPVKEPRSLSAASAPLVETSTPLRL        | 61 | 4,5 | 2   | 2745.50 | 2745.55 | 3   | Amygdala          | 0.81  | 0.10 | 3 |
| ProSAAS                          | Big SAAS                    | ARPVKEPRSLSAASAPLVETSTPLRL        | 61 | 4,5 | 2   | 2745.50 | 2745.55 | 3   | Hippocampus       | 0.95  | 0.24 | 3 |
| ProSAAS                          | Big SAAS                    | ARPVKEPRSLSAASAPLVETSTPLRL        | 61 | 4,5 | 2   | 2745.50 | 2745.55 | 3   | Hypothalamus      | 0.60  | 0.03 | 2 |
| ProSAAS                          | Big SAAS                    | ARPVKEPRSLSAASAPLVETSTPLRL        | 61 | 4,5 | 2   | 2745.50 | 2745.55 | 3   | Prefrontal cortex | 1.06  | 0.13 | 2 |
| ProSAAS                          | Big SAAS                    | ARPVKEPRSLSAASAPLVETSTPLRL        | 61 | 4,5 | 2   | 2745.50 | 2745.55 | 3   | Striatum          | 0.57  | 0.13 | 3 |
| ProSAAS                          | Big SAAS                    | ARPVKEPRSLSAASAPLVETSTPLRL        | 61 | 4,5 | 2   | 2745.50 | 2745.55 | 3   | Thalamus          | 0.46  | 0.02 | 2 |
| ProSAAS                          | GAV                         | AVPRGEAAGAVQELARALAHLLLEAERQE     | 78 | 4,5 | 1   | 2954.49 | 2954.58 | -1  | Amygdala          | 0.61  | 0.08 | 3 |
| ProSAAS                          | GAV                         | AVPRGEAAGAVQELARALAHLLLEAERQE     | 78 | 4,5 | 1   | 2954.49 | 2954.58 | -1  | Hippocampus       | 0.63  | 0.10 | 3 |
| ProSAAS                          | GAV                         | AVPRGEAAGAVQELARALAHLLLEAERQE     | 78 | 4,5 | 1   | 2954.49 | 2954.58 | -1  | Hypothalamus      | 0.67  | 0.07 | 4 |
| ProSAAS                          | GAV                         | AVPRGEAAGAVQELARALAHLLLEAERQE     | 78 | 4,5 | 1   | 2954.49 | 2954.58 | -1  | Prefrontal cortex | 0.49  | 0.13 | 3 |
| ProSAAS                          | GAV                         | AVPRGEAAGAVQELARALAHLLLEAERQE     | 78 | 4,5 | 1   | 2954.49 | 2954.58 | -1  | Striatum          | 0.53  | 0.10 | 3 |
| ProSAAS                          | GAV                         | AVPRGEAAGAVQELARALAHLLLEAERQE     | 78 | 4,5 | 1   | 2954.49 | 2954.58 | -1  | Thalamus          | 0.72  | 0.08 | 3 |
| ProSAAS                          | 62-91                       | (AVPRGEAAGAVQELARALAHLLLEAERQERA) | 75 | 6   | 1   | 3181.48 | 3181.71 | 34  | Striatum          | 0.99  | 0.09 | 2 |
| ProSAAS                          | 62-91                       | (AVPRGEAAGAVQELARALAHLLLEAERQERA) | 75 | 6   | 1   | 3181.48 | 3181.71 | 34  | Thalamus          | 1.18  | 0.16 | 3 |
| Protachykinin A                  | Neurokinin A                | HKTDSFVGLM-amide                  | 59 | 3   | 2   | 1132.54 | 1132.55 | 12  | Amygdala          | 0.55  | 0.22 | 3 |
| Protachykinin A                  | Neurokinin A                | HKTDSFVGLM-amide                  | 59 | 3   | 2   | 1132.54 | 1132.55 | 12  | Hippocampus       | 0.33  | 0.01 | 2 |
| Protachykinin A                  | Neurokinin A                | HKTDSFVGLM-amide                  | 59 | 3   | 2   | 1132.54 | 1132.55 | 12  | Hypothalamus      | 0.55  | 0.13 | 3 |
| Protachykinin A                  | Neurokinin A                | HKTDSFVGLM-amide                  | 59 | 3   | 2   | 1132.54 | 1132.55 | 12  | Striatum          | 0.28  | 0.09 | 3 |
| Protachykinin A                  | Neurokinin A                | HKTDSFVGLM-amide                  | 59 | 3   | 2   | 1132.54 | 1132.55 | 12  | Thalamus          | 0.33  | 0.13 | 3 |
| Protachykinin A                  | Substance P                 | RPKPQQFFGLM-amide                 | 62 | 2,3 | 1,2 | 1346.71 | 1346.74 | -6  | Amygdala          | 0.76  | 0.14 | 3 |
| Protachykinin A                  | Substance P                 | RPKPQQFFGLM-amide                 | 62 | 2,3 | 1,2 | 1346.71 | 1346.74 | -6  | Hippocampus       | 0.57  | 0.11 | 3 |
| Protachykinin A                  | Substance P                 | RPKPQQFFGLM-amide                 | 62 | 2,3 | 1,2 | 1346.71 | 1346.74 | -6  | Hypothalamus      | 0.74  | 0.12 | 4 |
| Protachykinin A                  | Substance P                 | RPKPQQFFGLM-amide                 | 62 | 2,3 | 1,2 | 1346.71 | 1346.74 | -6  | Striatum          | 0.45  | 0.13 | 3 |
| Protachykinin A                  | Substance P                 | RPKPQQFFGLM-amide                 | 62 | 2,3 | 1,2 | 1346.71 | 1346.74 | -6  | Thalamus          | 0.58  | 0.16 | 3 |
| Protachykinin A                  | C-terminal flanking peptide | ALNSVAYERSAMQNYE                  | 60 | 2,3 | 1   | 1844.85 | 1844.84 | 26  | Hypothalamus      | 0.64  | 0.15 | 4 |
| Protachykinin A                  | C-terminal flanking peptide | ALNSVAYERSAMQNYE                  | 60 | 2,3 | 1   | 1844.85 | 1844.84 | 26  | Striatum          | 0.41  | 0.02 | 2 |
| Protachykinin A                  | C-terminal flanking peptide | ALNSVAYERSAMQNYE                  | 60 | 2,3 | 1   | 1844.85 | 1844.84 | 26  | Thalamus          | 0.56  | 0.04 | 2 |
| Protachykinin A                  | 72-95                       | DADSSVEKQVALLKALYGHGQISH          | 67 | 5   | 3   | 2565.34 | 2565.32 | 20  | Hippocampus       | <0.10 |      | 1 |
| Protachykinin A                  | 72-95                       | DADSSVEKQVALLKALYGHGQISH          | 67 | 5   | 3   | 2565.34 | 2565.32 | 20  | Thalamus          | <0.10 |      | 1 |
| Protachykinin B                  | Neurokinin B                | DMHDFVGLM-amide                   | 76 | 2   | 1   | 1209.52 | 1209.52 | 24  | Hypothalamus      | 0.85  | 0.20 | 4 |
| Protachykinin B                  | Neurokinin B                | DMHDFVGLM-amide                   | 76 | 2   | 1   | 1209.52 | 1209.52 | 24  | Prefrontal cortex | 0.88  | 0.10 | 2 |
| Protachykinin B                  | Neurokinin B                | DMHDFVGLM-amide                   | 76 | 2   | 1   | 1209.52 | 1209.52 | 24  | Striatum          | 0.81  | 0.17 | 2 |
| Protachykinin B                  | Neurokinin B                | DMHDFVGLM-amide                   | 76 | 2   | 1   | 1209.52 | 1209.52 | 24  | Thalamus          | 0.82  |      | 1 |
| Prothyrotropin releasing hormone | 160-169                     | SFPWMESDVT                        | 71 | 1   | 1   | 1197.55 | 1197.50 | -9  | Hypothalamus      | 0.84  | 0.15 | 4 |
| Prothyrotropin releasing hormone | 57-74                       | DLQVRVGDLAGALDSWIT                | 74 | 3   | 1   | 1985.17 | 1985.03 | 18  | Hypothalamus      | 1.02  | 0.09 | 4 |
| Prothyrotropin releasing hormone | 178-200                     | FIDPELQRSWEETEGLMPE               | 74 | 2   | 1   | 2677.34 | 2677.19 | 7   | Hypothalamus      | 0.97  | 0.07 | 4 |
| Prothyrotropin releasing hormone | 25-50                       | LLEAAQEEGAVTPDLPGLEKVQRPE         | 69 | 3,4 | 2   | 2787.48 | 2787.48 | -13 | Amygdala          | 1.05  | 0.29 | 3 |
| Prothyrotropin releasing hormone | 25-50                       | LLEAAQEEGAVTPDLPGLEKVQRPE         | 69 | 3,4 | 2   | 2787.48 | 2787.48 | -13 | Hypothalamus      | 0.86  | 0.06 | 4 |
| Prothyrotropin releasing hormone | 25-50                       | LLEAAQEEGAVTPDLPGLEKVQRPE         | 69 | 3,4 | 2   | 2787.48 | 2787.48 | -13 | Striatum          | 0.98  | 0.23 | 2 |
| Prothyrotropin releasing hormone | 25-50                       | LLEAAQEEGAVTPDLPGLEKVQRPE         | 69 | 3,4 | 2   | 2787.48 | 2787.48 | -13 | Thalamus          | 0.91  | 0.13 | 2 |
| ProVasoactive Intestinal Peptide | 111-122                     | ISSSISDPVPI                       | 67 | 2   | 1   | 1242.70 | 1242.63 | -17 | Hypothalamus      | <0.10 |      | 3 |
| ProVasoactive Intestinal Peptide | 111-122                     | ISSSISDPVPI                       | 67 | 2   | 1   | 1242.70 | 1242.63 | -17 | Prefrontal cortex | <0.10 |      | 2 |

|                   |         |                                   |    |     |     |         |         |     |                   |       |      |   |
|-------------------|---------|-----------------------------------|----|-----|-----|---------|---------|-----|-------------------|-------|------|---|
| Provasopressin    | 151-165 | VQLAGTRESVDSAKP                   | 52 | 3   | 2   | 1556.82 | 1556.82 | -3  | Hypothalamus      | 0.93  |      | 1 |
| Provasopressin    | 154-end | (AGTRESVDSAKPRVY)                 | 51 | 4   | 2   | 1634.94 | 1634.84 | 4   | Hypothalamus      | 0.78  | 0.11 | 2 |
| Provasopressin    | 154-end | (AGTRESVDSAKPRVY)                 | 51 | 4   | 2   | 1634.94 | 1634.84 | 4   | Thalamus          | 0.88  |      | 1 |
| Provasopressin    | 151-end | VQLAGTRESVDSAKPRVY                | 55 | 3,4 | 1,2 | 1975.12 | 1975.05 | 8   | Amygdala          | 1.32  | 0.12 | 2 |
| Provasopressin    | 151-end | VQLAGTRESVDSAKPRVY                | 55 | 3,4 | 1,2 | 1975.12 | 1975.05 | 8   | Hypothalamus      | 0.93  | 0.20 | 4 |
| Provasopressin    | 151-end | VQLAGTRESVDSAKPRVY                | 55 | 3,4 | 1,2 | 1975.12 | 1975.05 | 8   | Striatum          | 0.82  | 0.35 | 2 |
| Provasopressin    | 151-end | VQLAGTRESVDSAKPRVY                | 55 | 3,4 | 1,2 | 1975.12 | 1975.05 | 8   | Thalamus          | 0.72  | 0.15 | 3 |
| Secretogranin II  | 300-316 | ESKDQLEDASKVITYL                  | 70 | 3   | 3   | 1924.95 | 1924.96 | -3  | Amygdala          | 1.09  | 0.11 | 3 |
| Secretogranin II  | 300-316 | ESKDQLEDASKVITYL                  | 70 | 3   | 3   | 1924.95 | 1924.96 | -3  | Hippocampus       | 1.20  | 0.12 | 3 |
| Secretogranin II  | 300-316 | ESKDQLEDASKVITYL                  | 70 | 3   | 3   | 1924.95 | 1924.96 | -3  | Hypothalamus      | 0.97  | 0.14 | 4 |
| Secretogranin II  | 300-316 | ESKDQLEDASKVITYL                  | 70 | 3   | 3   | 1924.95 | 1924.96 | -3  | Prefrontal cortex | 1.04  | 0.08 | 2 |
| Secretogranin II  | 300-316 | ESKDQLEDASKVITYL                  | 70 | 3   | 3   | 1924.95 | 1924.96 | -3  | Striatum          | 1.31  | 0.21 | 2 |
| Secretogranin II  | 300-316 | ESKDQLEDASKVITYL                  | 70 | 3   | 3   | 1924.95 | 1924.96 | -3  | Thalamus          | 0.95  | 0.16 | 3 |
| Secretogranin II  | 569-610 | IPVGLKNEPTPNRQYLEDMLLKVLEYLNQEQA  | 76 | 5,6 | 2,3 | 4895.73 | 4895.44 | -8  | Hypothalamus      | 0.54  | 0.05 | 4 |
| Secretogranin III | 23-36   | FPKPEGSQDKSLHN                    | 51 | 4   | 3   | 1582.73 | 1582.77 | 16  | Amygdala          | 0.96  | 0.12 | 3 |
| Secretogranin III | 23-36   | FPKPEGSQDKSLHN                    | 51 | 4   | 3   | 1582.73 | 1582.77 | 16  | Hippocampus       | 1.03  | 0.12 | 3 |
| Secretogranin III | 23-36   | FPKPEGSQDKSLHN                    | 51 | 4   | 3   | 1582.73 | 1582.77 | 16  | Hypothalamus      | 0.91  | 0.14 | 3 |
| Secretogranin III | 23-36   | FPKPEGSQDKSLHN                    | 51 | 4   | 3   | 1582.73 | 1582.77 | 16  | Prefrontal cortex | 0.96  | 0.24 | 3 |
| Secretogranin III | 23-36   | FPKPEGSQDKSLHN                    | 51 | 4   | 3   | 1582.73 | 1582.77 | 16  | Striatum          | 0.91  | 0.26 | 3 |
| Secretogranin III | 23-36   | FPKPEGSQDKSLHN                    | 51 | 4   | 3   | 1582.73 | 1582.77 | 16  | Thalamus          | 0.87  | 0.18 | 3 |
| VGF               | 489-507 | NAPPEPVPPPRAAPATHV                | 54 | 3   | 1   | 1914.00 | 1914.01 | 16  | Amygdala          | 0.60  | 0.16 | 3 |
| VGF               | 489-507 | NAPPEPVPPPRAAPATHV                | 54 | 3   | 1   | 1914.00 | 1914.01 | 16  | Hippocampus       | 0.52  | 0.06 | 3 |
| VGF               | 489-507 | NAPPEPVPPPRAAPATHV                | 54 | 3   | 1   | 1914.00 | 1914.01 | 16  | Hypothalamus      | 0.79  | 0.12 | 2 |
| VGF               | 489-507 | NAPPEPVPPPRAAPATHV                | 54 | 3   | 1   | 1914.00 | 1914.01 | 16  | Prefrontal cortex | 0.45  | 0.09 | 3 |
| VGF               | 489-507 | NAPPEPVPPPRAAPATHV                | 54 | 3   | 1   | 1914.00 | 1914.01 | 16  | Striatum          | 0.42  | 0.15 | 2 |
| VGF               | 489-507 | NAPPEPVPPPRAAPATHV                | 54 | 3   | 1   | 1914.00 | 1914.01 | 16  | Thalamus          | 0.47  | 0.22 | 3 |
| VGF               | 487-507 | KKNAPPEPVPPPRAAPATHV              | 51 | 5   | 3   | 2170.21 | 2170.20 | 4   | Amygdala          | <0.10 |      | 3 |
| VGF               | 487-507 | KKNAPPEPVPPPRAAPATHV              | 51 | 5   | 3   | 2170.21 | 2170.20 | 4   | Hippocampus       | <0.10 |      | 3 |
| VGF               | 487-507 | KKNAPPEPVPPPRAAPATHV              | 51 | 5   | 3   | 2170.21 | 2170.20 | 4   | Hypothalamus      | <0.10 |      | 4 |
| VGF               | 487-507 | KKNAPPEPVPPPRAAPATHV              | 51 | 5   | 3   | 2170.21 | 2170.20 | 4   | Prefrontal cortex | <0.10 |      | 3 |
| VGF               | 487-507 | KKNAPPEPVPPPRAAPATHV              | 51 | 5   | 3   | 2170.21 | 2170.20 | 4   | Thalamus          | <0.10 |      | 3 |
| VGF               | 285-310 | (LEGSFLGGSEAGERLLQQGLAQVEA-amide) | 78 | 3   | 1   | 2557.20 | 2557.32 | 3   | Hypothalamus      | 0.68  | 0.08 | 4 |
| VGF               | 285-310 | (LEGSFLGGSEAGERLLQQGLAQVEA-amide) | 78 | 3   | 1   | 2557.20 | 2557.32 | 3   | Striatum          | 0.40  |      | 1 |
| VGF               | 285-310 | (LEGSFLGGSEAGERLLQQGLAQVEA-amide) | 78 | 3   | 1   | 2557.20 | 2557.32 | 3   | Thalamus          | 0.66  | 0.15 | 3 |
| VGF               | 180-209 | (QQETAAAETETRTHTL TRVNLESPGPERVW) | 60 | 5   | 1   | 3406.70 | 3406.69 | -16 | Hippocampus       | <0.10 |      | 1 |
| VGF               | 180-209 | (QQETAAAETETRTHTL TRVNLESPGPERVW) | 60 | 5   | 1   | 3406.70 | 3406.69 | -16 | Prefrontal cortex | <0.10 |      | 2 |
| VGF               | 588-617 | (AQEEADAERRLQEQEENYIEHVLLHRP)     | 70 | 6   | 1   | 3672.55 | 3672.78 | 4   | Hippocampus       | 0.44  |      | 1 |
| VGF               | 588-617 | (AQEEADAERRLQEQEENYIEHVLLHRP)     | 70 | 6   | 1   | 3672.55 | 3672.78 | 4   | Prefrontal cortex | 0.29  | 0.05 | 2 |
| VGF               | 588-617 | (AQEEADAERRLQEQEENYIEHVLLHRP)     | 70 | 6   | 1   | 3672.55 | 3672.78 | 4   | Striatum          | 0.26  | 0.01 | 3 |
| VGF               | 588-617 | (AQEEADAERRLQEQEENYIEHVLLHRP)     | 70 | 6   | 1   | 3672.55 | 3672.78 | 4   | Thalamus          | 0.44  | 0.07 | 3 |

**Supplemental Table S-2. Neuropeptides and other secretory pathway peptides detected in wild type mouse brain but not detectable in PC2 KO mouse brain.**

| Precursor                    | Peptide Name           | N-term Flanking | Peptide Sequence            | C-term Flanking | Theor. Mass | Region              | PC2:WT Avg | n  |
|------------------------------|------------------------|-----------------|-----------------------------|-----------------|-------------|---------------------|------------|----|
| 7B2                          | 167-176                | KWNKK           | (LLYEKMKGGQ)                | RRKRR           | 1165.60     | PC, T               | <0.10      | 3  |
| CART                         | 33-50                  | RRQLR           | APGAMLQIEALQEVLLKLL         | KSKRI           | 1951.12     | A, Hy, T            | <0.13      | 9  |
| CART                         | 33-52                  | RRQLR           | APGAMLQIEALQEVLLKLLKS       | KRIPI           | 2166.25     | A, Hy, T            | <0.10      | 5  |
| Chromogranin A               | 392-402                | SFRTR           | AYGFRDPGQPL                 | RRGWR           | 1219.60     | Hi, Hy, PC          | <0.10      | 8  |
| Chromogranin A               | 358-371                | WEDKR           | WSRMDQLAKELTAE              | KRLEG           | 1676.82     | A, Hi, Hy, PC, T    | <0.10      | 13 |
| Chromogranin A               | 374-390                | TAEKR           | LEGEDDPDRSMKLSFRT           | RAYGF           | 1994.94     | A, Hi, Hy, PC, S, T | <0.10      | 16 |
| Chromogranin B               | 457-466                | DTAKR           | YPQSKWQEQE                  | KNYLN           | 1321.59     | Hi, PC              | <0.10      | 2  |
| Chromogranin B               | 600-613                | LDLKR           | QYDGVAEIQLLHY               | RKKAD           | 1662.79     | A, Hi, PC, T        | <0.10      | 9  |
| Chromogranin B               | 438-453                | REEKR           | LLDEGHYPVRESPIDT            | AKRYP           | 1839.90     | A, Hi, Hy, S        | <0.10      | 11 |
| Chromogranin B               | 438-454                | REEKR           | LLDEGHYPVRESPIDTA           | KRYPQ           | 1910.93     | A, Hi, Hy, PC, S, T | <0.10      | 17 |
| Chromogranin B               | 313-330                | SEERR           | PSPKESKEADVATVRLGE          | KRSHH           | 1911.99     | A, Hi, PC, T        | <0.10      | 9  |
| Chromogranin B               | 64-86                  | QVLKK           | SGKEVKGEEKGENQSKFEVRL       | RDPAD           | 2604.35     | A, Hi, Hy, PC, S, T | <0.10      | 17 |
| Procholecystokinin           | 56-63                  | DGEPR           | ARLGALLA                    | RYIQQ           | 783.50      | A, PC               | <0.10      | 6  |
| Procholecystokinin           | 43-60                  | EAPRR           | (QLRAVLRDGEPRARLGA)         | RYIQQ           | 1978.12     | A, Hi, Hy, PC, T    | <0.10      | 11 |
| Procholecystokinin           | 72-93                  | APRRK           | (APSGRMSVLKNIQSLDPSHRIS)    | DRDYM           | 2392.26     | A, Hi, PC           | <0.10      | 7  |
| Procholecystokinin           | 72-94                  | APRRK           | APSGRMSVLKNIQSLDPSHRISD     | RDYMG           | 2507.29     | A, Hi, PC           | <0.10      | 9  |
| Procholecystokinin           | 46-69                  | RRQLR           | (AVLRDGEPRARLQSLDPSHRISQV)  | RKAPS           | 2665.51     | A, Hi, PC, T        | <0.10      | 11 |
| Prodynorphin                 | Dynorphin A8           | DLYKR           | YGGFLRRI                    | RPKPK           | 980.56      | A, Hi, Hy, PC, S, T | <0.10      | 19 |
| Prodynorphin                 | Dynorphin A10-17       | LRRIR           | PKLKWQDQ                    | KRYGG           | 1027.55     | A, Hi, PC, T        | <0.10      | 7  |
| Prodynorphin                 | Dynorphin B13          | DNQKR           | (YGGFLRRQFKVVT)             | RSQEN           | 1569.88     | A, Hi, Hy, PC, T    | <0.10      | 13 |
| Prodynorphin                 | Dynorphin A17          | DLYKR           | (YGGFLRRIRPKLKWQDQ)         | KRYGG           | 2146.19     | Hi, T               | <0.10      | 2  |
| Proenkephalin                | Leu-Enkephalin         | DYQKR           | YGGFL                       | KRFAE           | 555.27      | A, S                | <0.10      | 6  |
| Proenkephalin                | Octapeptide            | MSSKR           | YGGFMRS                     | KRSPQ           | 929.45      | A, Hi, Hy, S, T     | <0.10      | 15 |
| Proenkephalin                | Metorphamide           | ELQKR           | YGGFMRRV-amide              | GRPEW           | 983.50      | T                   | <0.10      | 1  |
| Proenkephalin                | Metorphamide precursor | ELQKR           | YGGFMRRVGR                  | PEWWM           | 1197.62     | T                   | <0.10      | 1  |
| Proenkephalin                | 218-228                | GFMRR           | VGRPEWWMQDYQ                | KRYGG           | 1465.65     | A, Hi, Hy, PC, S, T | <0.10      | 17 |
| Progastrin Releasing Peptide | 43-52 amide            | KMYPR           | (GSHWAVGHLM-amide)          | GKST            | 1092.51     | PC                  | <0.10      | 2  |
| Prohormone Convertase 1/3    | 619-628                | QNDRR           | GVEKMNVAE                   | KRPTQ           | 1102.57     | Hy                  | <0.10      | 3  |
| Prohormone Convertase 2      | C-terminal fragment    | EAVER           | SLQSILRKN                   | *               | 1057.62     | A, Hi, Hy, PC, S, T | <0.10      | 17 |
| Prohormone Convertase 2      | 94-104                 | ERDPR           | IKMALQQEGFD                 | RKRG            | 1278.64     | A, Hi, Hy, PC       | <0.10      | 7  |
| Prohormone Convertase 2      | C-terminal fragment    | AMSCK           | pyroE-ELEEEELDEAVERSLSILRKN | *               | 2610.31     | Hy                  | <0.10      | 4  |
| Promelanin Concentrating     | Neuropeptide EI        | EQEKR           | EIGDEENSAKFFPI-amide        | GRRDF           | 1446.68     | Hi, Hy, PC          | <0.10      | 8  |



| Hormone                          |                   |       |                                  |       |         |                  |       |    |  |
|----------------------------------|-------------------|-------|----------------------------------|-------|---------|------------------|-------|----|--|
| Proopiomelanocortin              | Des-acetyl-MSH    | REGKR | YSMEHFRWGKPV-amide               | GKKRR | 1621.77 | Hy               | <0.10 | 4  |  |
| Proopiomelanocortin              | Alpha-MSH         | REGKR | Ac-SYSMEHFRWGKPV-amide           | GKKRR | 1663.79 | Hy               | <0.10 | 4  |  |
| Proopiomelanocortin              | Alpha-MSH (oxide) | REGKR | Ac-SYS-Mox-EHFRWGKPV-amide       | GKKRR | 1679.80 | Hy               | <0.10 | 2  |  |
| Proopiomelanocortin              | CLIP              | VGKKR | RPVKVYPNVAENESAEPFLEF            | KRELE | 2505.26 | Hy               | <0.10 | 4  |  |
| Proopiomelanocortin              | CLIP + phosphate  | VGKKR | RPVKVYPNVAENE-phosphoS-AEAFPLEF  | KRELE | 2585.23 | Hy               | <0.10 | 2  |  |
| Protachykinin A                  | 72-95             | LMGKR | DADSSVEKQVALLKALYGHGQISH         | KRHKT | 2565.32 | Hi, T            | <0.10 | 2  |  |
| Provasoactive Intestinal Peptide | 111-122           | LIGKR | ISSSIEDPVI                       | KRHSD | 1242.63 | Hy, PC           | <0.10 | 5  |  |
| VEGF                             | 487-507           | EKRKR | KKNAPPEPVPRAAPATHV               | RSPQP | 2170.20 | A, Hi, Hy, PC, T | <0.10 | 16 |  |
| VEGF                             | 180-209           | SNAKR | (QQETAAAETETRTHLTRYNLESPGPERVVM) | RASWG | 3406.69 | Hi, PC           | <0.10 | 3  |  |

**Precursor:** name of protein precursor from which peptide is derived. CART, cocaine- and amphetamine-regulated transcript. Note that 7B2 and VGF are names, not abbreviations. **Peptide name:** common name of peptide, or sequence position within precursor. CLIP, corticotropin-like intermediate lobe peptide; MSH, melanocyte-stimulating hormone. **N-term flanking:** the 5 amino acids in the precursor adjacent to the N-terminus of the peptide are indicated. **Peptide sequence:** The peptide sequences bracketed by parentheses represent tentatively identified peptides (i.e. based on mass, charge state, and number of isotopic tags incorporated). All other peptides were identified unambiguously by sequencing. Mox, oxidized Met; phosphoS, phosphorylated Ser. **C-term flanking:** the 5 amino acids in the precursor adjacent to the C-terminus of the peptide are indicated. \* in this column represent the C-terminal end of the precursor protein. **Theor. mass:** theoretical monoisotopic mass (in Da) of the unprotonated peptide (after subtracting the mass of the tags). **Region:** A, amygdala; Hi, hippocampus; Hy, hypothalamus; PC, prefrontal cortex; S, striatum; T, thalamus. **PC2:WT Avg:** the average ratio of peptide levels in extracts of PC2 KO mouse brain regions relative to the levels in extracts from wild type mice. **n:** number of times the peptide was detected in different samples.

**Supplemental Table S-3. Neuropeptides and other secretory pathway peptides detected in wild type mouse brain and also detectable at lower levels in PC2 KO mouse brain.**

| Precursor           | Peptide Name                | N-term Flanking | Peptide Sequence                               | C-term Flanking | Theor. Mass          | Region              | PC2 :WT Avg | SD   | n  | WT: WT Avg | SD   | n  | p-value |
|---------------------|-----------------------------|-----------------|------------------------------------------------|-----------------|----------------------|---------------------|-------------|------|----|------------|------|----|---------|
| Chromogranin B      | 438-446                     | REEKR           | LLDEGHYPV                                      | RESPI           | 1041.52              | A, Hi, Hy, PC, S, T | 0.56        | 0.16 | 15 | 1.04       | 0.16 | 8  | **      |
| Chromogranin B      | 588-597                     | GYEKR           | SFARAPQLDL                                     | KRQYD           | 1116.59              | A, Hi, Hy, PC, S, T | 0.33        | 0.13 | 15 | 1.08       | 0.27 | 8  | **      |
| Chromogranin B      | 516-535                     | EKRKR           | LGALFNPFYDFPLQWKNSDFE                          | KRGNP           | 2400.15              | A, Hi, Hy           | 0.38        | 0.11 | 8  | 1.02       | 0.18 | 7  | **      |
| Procholecystokinin  | 46-63                       | RRQLR           | AVLRTDGEPARLQALLA                              | RYIQQ           | 1878.08              | A, Hi, Hy, PC, S, T | 0.79        | 0.20 | 15 | 0.96       | 0.08 | 7  | *       |
| Procholecystokinin  | 71-94                       | EAPRR           | KAPSGRMSVLKNLQSLDPSHRISD                       | RDYMG           | 2635.39              | A, Hi, PC           | 0.42        | 0.07 | 8  | 1.08       | 0.12 | 6  | **      |
| Prodynorphin        | $\alpha$ -neoeendorphin     | KQAKR           | YGGFLRKYPK                                     | RSSEM           | 1227.68              | A, Hi, Hy, PC, S, T | 0.32        | 0.18 | 19 | 1.04       | 0.12 | 9  | **      |
| Proenkephalin       | Heptapeptide                | EIEKR           | YGGFMRF                                        | *               | 876.40               | A, Hi, Hy, PC, S, T | 0.40        | 0.18 | 17 | 1.03       | 0.19 | 10 | **      |
| Proenkephalin       | 197-208                     | RSLKR           | SPQLEDEAKELQ                                   | KRYGG           | 1385.67              | Hy                  | 0.74        | 0.07 | 4  | 0.93       | 0.19 | 14 | NS      |
| Proenkephalin       | 238-261                     | GFLKR           | FAESLPSDEEGENYSKEVPEIE                         | KRYGG           | 2497.10              | Hy                  | 0.55        | 0.07 | 3  | 0.93       | 0.25 | 3  | *       |
| Proenkephalin       | 238-261 + phosphate         | GFLKR           | FAESLP-phosphoS-DEEGENYSKEVPEIE                | KRYGG           | 2577.06              | Hy                  | 0.57        | 0.07 | 4  | 0.99       | 0.24 | 3  | **      |
| Proneuropeptide Y   | Neuropeptide Y              | Sig pep         | (YPSKPDNPGEDAPAEEDMARRYYSALRHYINLITRQRY-amide) | GKRSS           | 4271.73 <sup>a</sup> | PC                  | 0.43        | 0.08 | 2  | 1.09       | 0.27 | 4  | *       |
| Proenkephalin       | Neuropeptide N              | EVIKR           | KIPYIL                                         | KRQLY           | 745.47               | A, Hi, Hy, S, T     | 0.56        | 0.18 | 14 | 0.93       | 0.13 | 6  | **      |
| Proopiomelanocortin | J-peptide                   | AAQRR           | AEEEEVWGDGSPESPPE-amide                        | GKRSY           | 1939.86              | Hy                  | 0.42        | 0.06 | 3  | 0.63       | 0.29 | 3  | NS      |
| Proopiomelanocortin | 165-189                     | LEFKR           | (ELEGERPLGLEQVLESDAEKDDGPY)                    | RVEHF           | 2787.31              | Hy                  | 0.52        | 0.10 | 4  | ND         |      |    |         |
| ProSAAS             | Big LEN 1-15                | LRVKR           | (LENPSQAPARRLLP)                               | P*              | 1657.93              | Hy, T               | 0.78        | 0.10 | 6  | 0.92       | 0.02 | 2  | NS      |
| ProSAAS             | Big SAAS 1-24               | signal peptide  | ARPVKEPRSLSAASAPLVETSTPL                       | RLRRA           | 2476.37              | Hy                  | 0.76        | 0.07 | 4  | 0.85       | 0.23 | 3  | NS      |
| ProSAAS             | GAV                         | LRLRR           | AVPRGEAAGAVQELARALAHLEAER                      | RARAE           | 2954.58              | A, Hi, Hy, PC, S, T | 0.61        | 0.12 | 19 | 0.95       | 0.13 | 10 | **      |
| Protachykinin A     | Neurokinin A                | ISHKR           | HKTDSFVGLM-amide                               | GKRAL           | 1132.55              | A, Hi, Hy, S, T     | 0.41        | 0.18 | 14 | 1.04       | 0.19 | 9  | **      |
| Protachykinin A     | Substance P                 | QRIAR           | RPKPQQFFGLM-amide                              | GKRDA           | 1346.74              | A, Hi, Hy, S, T     | 0.62        | 0.18 | 18 | 0.98       | 0.13 | 11 | **      |
| Protachykinin A     | C-terminal flanking peptide | LMGKR           | ALNSVAYERSAMQNYE                               | RRR*            | 1844.84              | Hy, S, T            | 0.54        | 0.15 | 8  | 1.08       | 0.23 | 7  | **      |
| Secretogranin II    | 569-610                     | KVSKR           | IPVGSILKNETPNRQYLDEDMLLKYLE                    | KRAME           | 4895.44 <sup>a</sup> | Hy                  | 0.54        | 0.05 | 4  | 1.07       | 0.17 | 6  | **      |
| VEGF                | 489-507                     | RKRKK           | NAPPEPVPPRAAPATHV                              | RSPQP           | 1914.01              | A, Hi, Hy, PC, S, T | 0.54        | 0.18 | 16 | 1.04       | 0.32 | 10 | **      |
| VEGF                | 285-310                     | PKVRR           | (LEGSFLGGSEAGERLLQQGLAQVEA-amide)              | GRRQA           | 2557.32              | Hy, S, T            | 0.58        | 0.14 | 8  | 1.04       | 0.14 | 4  | **      |
| VEGF                | 588-617                     | AQARR           | (AQEEADAEERRLRQEELEENYIEHVL LHRP)              | *               | 3672.78              | Hi, PC, S, T        | 0.36        | 0.10 | 8  | 1.07       | 0.18 | 6  | **      |

Abbreviations are as described in Table S-2. Note that SAAS and GAV are names, not abbreviations. **SD**: standard deviation; **WT:WT Avg**: average ratio of peptide in replicates of different groups of wildtype mice. **p-value**: \*,  $p < 0.05$ ; \*\*,  $p < 0.01$  between the average ratios of PC2:WT and WT:WT, calculated using Student's t-test. NS, not significant. a) average theoretical mass (all other values are monoisotopic mass)

**Supplemental Table S-4. Neuropeptides and other secretory pathway peptides detected in wild type mouse brain and PC2 KO mouse brain at generally similar levels.**

| Precursor                           | Peptide Name          | N-term Flanking | Peptide Sequence                  | C-term Flanking | Theor. Mass | Region              | PC2:WT Avg | SD   | n  |
|-------------------------------------|-----------------------|-----------------|-----------------------------------|-----------------|-------------|---------------------|------------|------|----|
| Cerebellin 1 precursor protein      | Cerebellin 2-15       | /SVRS           | GSAKVAFSAIRSTN                    | HEPSE           | 1407.75     | A, Hi, Hy, PC, S, T | 1.03       | 0.28 | 17 |
| Cerebellin 1 precursor protein      | Cerebellin 1-15       | G/SVR           | SGSAKVAFAIRSTN                    | HEPSE           | 1494.78     | A, Hi, Hy, PC, S, T | 0.93       | 0.27 | 17 |
| Cerebellin 1 precursor protein      | Cerebellin 2-16       | /SVRS           | GSAKVAFSAIRSTNH                   | EPSEM           | 1544.81     | A, Hi, Hy, PC, S, T | 1.01       | 0.27 | 17 |
| Cerebellin 1 precursor protein      | Cerebellin            | G/SVR           | SGSAKVAFAIRSTNH                   | EPSEM           | 1631.84     | A, Hi, Hy, PC, S, T | 0.94       | 0.26 | 19 |
| Cerebellin 2                        | 89-102                | /SVRS           | GSAKVAFSATRSTN                    | HEPSE           | 1395.71     | PC, T               | 1.08       | 0.18 | 4  |
| Cerebellin 2                        | 88-102                | G/SVR           | (SGSAKVAFASTRSTN)                 | HEPSE           | 1482.74     | A, Hi, PC, T        | 0.93       | 0.10 | 7  |
| Cerebellin 2                        | 89-103                | /SVRS           | (GSAKVAFASTRSTNH)                 | EPSEM           | 1532.77     | PC, T               | 0.99       | 0.12 | 4  |
| Cerebellin 2                        | 88-103                | G/SVR           | (SGSAKVAFASTRSTNH)                | EPSEM           | 1619.80     | Hi, PC, S, T        | 0.95       | 0.18 | 7  |
| Cerebellin 4                        | 66-77                 | VRAAN           | SKVAFSAVRSTN                      | HEPSE           | 1265.67     | A, Hi, PC, S, T     | 0.91       | 0.16 | 15 |
| Cerebellin 4                        | 64-77                 | /SVRA           | ANSKVAFAVRSTN                     | HEPSE           | 1450.75     | A, Hi, PC, T        | 0.94       | 0.15 | 10 |
| Cerebellin 4                        | 63-77                 | G/SVR           | AANSKVAFAVRSTN                    | HEPSE           | 1521.79     | Hi, PC, T           | 1.13       | 0.16 | 6  |
| Chromogranin B                      | 357-374               | SRSYR           | GLQYRGRGSEEDRAPRPR                | SEESQ           | 2099.07     | A, Hi, PC, T        | 1.01       | 0.20 | 12 |
| Chromogranin B                      | 357-374 + phosphate   | SRSYR           | GLQYRGRG-phosphoS-EEDRAPRPR       | SEESQ           | 2179.07     | A, Hi, Hy, PC, S, T | 1.05       | 0.19 | 17 |
| Chromogranin B                      | 64-83                 | QVLLK           | (SGKEVKGEEKGENQSKFEV)             | RLLRD           | 2222.08     | Hi, PC, S, T        | 1.01       | 0.08 | 7  |
| Chromogranin B                      | 309-330               | G/HPLS          | (EERRPSPKESKEADVATVRLGE)          | KRSHH           | 2482.28     | Hi, PC              | 1.10       | 0.12 | 3  |
| Procholecystokinin                  | 52-62                 | VLRTD           | (GEPARLGGALL)                     | ARYIQ           | 1151.68     | Hi, PC, S, T        | 0.92       | 0.19 | 11 |
| Procholecystokinin                  | 46-58 amide           | RRQLR           | (AVLRTDGEPRARL-amide)             | GALLA           | 1451.82     | A, Hi, PC, S, T     | 0.99       | 0.17 | 12 |
| Procholecystokinin                  | 46-60                 | RRQLR           | AVLRTDGEPRARLGA                   | LLARY           | 1580.88     | A, Hi, PC, S, T     | 1.05       | 0.24 | 11 |
| Procholecystokinin                  | 46-61                 | RRQLR           | AVLRTDGEPRARLGGAL                 | LARYI           | 1693.97     | A, Hi, PC, S, T     | 0.98       | 0.27 | 14 |
| Procholecystokinin                  | 46-62                 | RRQLR           | AVLRTDGEPRARLGGALL                | ARYIQ           | 1807.04     | A, Hi, Hy, PC, S, T | 0.98       | 0.25 | 16 |
| Prodynorphin                        | $\beta$ -neoendorphin | KQAKR           | YGGFLRKYP                         | KRSSE           | 1099.58     | Hy, T               | 0.83       | 0.06 | 5  |
| Progastrin Releasing Peptide        | 24-41                 | Sig pep         | (APVSTGAGGGTVLAKMYP)              | RGSHW           | 1675.86     | Hy                  | 1.04       | 0.14 | 2  |
| Prohormone Convertase 1             | 90-108                | HITKR           | LSDDDRVTWAEQQYEKERS               | KRSVQ           | 2354.07     | Hi, Hy              | 0.99       | 0.21 | 4  |
| Propeptidyl-amidating-monooxygenase | Cleaved pro peptide   | Sig pep         | FRSPLSVF                          | KRFKE           | 951.53      | A, Hi, Hy, PC, S, T | 0.83       | 0.20 | 15 |
| ProSAAS                             | Little SAAS 5-18      | RSLSA           | ASAPLVETSTPLRL                    | RRAVP           | 1453.81     | A, Hy, T            | 0.80       | 0.13 | 7  |
| ProSAAS                             | Little SAAS 1-16      | VKEPR           | SLSAASAPLVETSTPL                  | RLRRA           | 1542.81     | A, Hi, Hy, PC, S, T | 0.95       | 0.22 | 17 |
| ProSAAS                             | PEN-20                | RRLRR           | SVDQDLGPEVPPENVLGGALL             | RVKRL           | 2061.06     | Hy                  | 0.87       |      | 1  |
| ProSAAS                             | PEN                   | RRLRR           | SVDQDLGPEVPPENVLGGALLRV           | KRLRN           | 2316.23     | A, Hy               | 0.86       | 0.11 | 6  |
| ProSAAS                             | GAV 5-28              | RAVPR           | GEAAGAVQELARALAHILLEAERQOE        | RARAE           | 2531.31     | A, Hi, Hy, S, T     | 0.85       | 0.18 | 13 |
| ProSAAS                             | 62-91                 | LRLRR           | (AVPRGEAAGAVQELARALAHILLEAERQERA) | RAEAQ           | 3181.71     | S, T                | 1.08       | 0.17 | 5  |
| Protachykinin B                     | Neurokinin B          | LPQKR           | DMHDFVGLM-amide                   | GKRNS           | 1209.52     | Hy, PC, S, T        | 0.84       | 0.16 | 9  |
| Prothytrotropin Releasing Hormone   | 160-169               | HFGRR           | SFPWMESDVT                        | KRQHP           | 1197.50     | Hy                  | 0.84       | 0.15 | 4  |
| Prothytrotropin Releasing Hormone   | 57-74                 | RFLRK           | DLQRVRGDLGAALDSWIT                | KRQHP           | 1985.03     | Hy                  | 1.02       | 0.15 | 4  |

|                                  |         |                |                             |       |         |                     |      |      |    |
|----------------------------------|---------|----------------|-----------------------------|-------|---------|---------------------|------|------|----|
| Prothyrotropin Releasing Hormone | 178-200 | HPQRR          | FIDPELQRSWEETEGETEGLMPE     | KRQHP | 2677.19 | Hy                  | 0.97 | 0.09 | 4  |
| Prothyrotropin Releasing Hormone | 25-50   | <i>Sig pep</i> | LLEAAQEEGAVTPDLPGLEKVKQVRPE | RRFLR | 2787.48 | A, Hy, S, T         | 0.95 | 0.19 | 11 |
| Provasopressin                   | 151-165 | LLLRL          | VQLAGTRESVDSAKP             | RVY*  | 1556.82 | Hy                  | 0.93 |      | 1  |
| Provasopressin                   | 154-end | LRLVQ          | (AGTRESVDSAKPRVY)           | *     | 1634.84 | Hy, T               | 0.83 | 0.11 | 3  |
| Provasopressin                   | 151-end | LLLRL          | VQLAGTRESVDSAKPRVY          | *     | 1975.05 | A, Hy, S, T         | 0.95 | 0.25 | 11 |
| Secretogranin II                 | 300-316 | EENRR          | ESKDQLSEDASKVITYL           | RRLVN | 1924.96 | A, Hi, Hy, PC, S, T | 1.09 | 0.18 | 17 |
| Secretogranin III                | 23-36   | <i>Sig pep</i> | FPKPEGSDKSLHN               | RELSA | 1582.77 | A, Hi, Hy, PC, S, T | 0.94 | 0.19 | 18 |

Abbreviations are defined in Supplemental Tables S-2 and S-3. *Sig pep*, signal peptide.

**Supplemental Table S-5. Neuropeptides and other secretory pathway peptides detected in wild type mouse brain and which increased and/or were variable in PC2 KO mouse brain.**

| Precursor          | Peptide Name        | N-term Flanking | Peptide Sequence                 | C-term Flanking | Theor. Mass | Region                | PC2:WT Avg    | SD           | n       | P-value |
|--------------------|---------------------|-----------------|----------------------------------|-----------------|-------------|-----------------------|---------------|--------------|---------|---------|
| Procholecystokinin | 65-94               | ALLAR           | (YIQVVRKAPSGRMSVLKNIQLSDPSHRISD) | RDYMG           | 3422.82     | PC                    | 1.45          | 0.19         | 3       |         |
| Chromogranin B     | 357-373             | SRSYR           | (GLQTRGRGSEEDRAPRP)              | RSEES           | 1942.97     | A, Hi, Hy, S, T<br>PC | 1.10<br>1.40  | 0.15<br>0.13 | 8<br>3  | *       |
| Chromogranin B     | 357-373 + phosphate | SRSYR           | (GLQTRGRG-phosphoS-EEDRAPRP)     | RSEES           | 2022.97     | Hy, S<br>A, Hi, PC    | 1.07<br>1.42  | 0.15<br>0.21 | 6<br>7  | **      |
| Procholecystokinin | 43-55               | EAPRR           | (QLRAVLRTDGEPK)                  | ARLGA           | 1509.84     | PC, T<br>A, Hi, S     | 0.65<br>0.99  | 0.05<br>0.17 | 3<br>7  | *       |
| Proneuropeptide Y  | C-terminal region   | RYGKR           | SSPETLISDLLMKESTENAPRTRLEDPMSMW  | *               | 3432.65     | PC<br>A, Hi, Hy, S, T | 0.44<br>0.95  | 0.05<br>0.22 | 2<br>14 | **      |
| Proneurotensin     | Neurotensin         | YLKLR           | pyroE-LYENKPRRPYIL               | KRGSY           | 1671.91     | Hy, S, T<br>A         | 0.73<br>1.18  | 0.11<br>0.12 | 8<br>3  | **      |
| Pronociceptin      | Nociceptin          | QLQKR           | FGFTGARKSARKLANQ                 | KRFSE           | 1807.98     | Hi, PC<br>A, T        | <0.10<br>0.26 | 0.06         | 4<br>4  |         |
| ProSAAS            | Big LEN             | LRVKR           | LENPSQAPARRLLPP                  | *               | 1754.98     | S, T<br>A, Hi, Hy, PC | 0.70<br>0.83  | 0.12<br>0.12 | 6<br>11 | NS      |
| ProSAAS            | Little SAAS         | VKEPR           | SLSAASAPLVETSTPLRL               | RRAVP           | 1812.01     | Hi, S, T<br>A, Hy, PC | 0.74<br>0.83  | 0.17<br>0.14 | 6<br>13 | NS      |
| ProSAAS            | Big SAAS            | Sig pep         | ARPVKEPRSLSAASAPLVETSTPLRL       | RRAVP           | 2745.55     | Hy, S, T<br>A, Hi, PC | 0.58<br>0.94  | 0.10<br>0.20 | 7<br>8  | **      |

Abbreviations are defined in Tables S2-S4. Note that LEN is a name, not an abbreviation. P-value indicates the statistical significance between the average PC2:WT ratio between the brain regions in the two different rows. \* p<0.05, \*\* p<0.01 using Student's t-test. NS, not significant

**Supplemental Table S-6. Peptides identified in both PC2 KO study and *Cpe<sup>fat/fat</sup>* mouse study (data used for Figure 3).**

| Precursor                         | Peptide Name         | N-term Flanking | Peptide Sequence                             | C-term Flanking | Theor. Mass | PC2:WT | Fat:WT |
|-----------------------------------|----------------------|-----------------|----------------------------------------------|-----------------|-------------|--------|--------|
| ProSAAS                           | PEN-20               | RRLRR           | SVDDDLGPEVPPENVLGALL                         | RVKRL           | 2061.06     | 0.87   | 0.08   |
| CART                              | 33-50                | RRQLR           | APGAMLQIEALQEVLKKL                           | KSKRI           | 1951.12     | <0.13  | 0.10   |
| Chromogranin B                    | 600-613              | LDLKR           | QYDGVAEIDQLLHY                               | RKKAD           | 1662.79     | <0.10  | 0.10   |
| Chromogranin B                    | 438-453              | REEKR           | LLDEGHYPVRESPIDT                             | AKRYP           | 1839.90     | <0.10  | 0.10   |
| Chromogranin B                    | 64-86                | QVLKK           | SGKEVKGEEKGENQSKFEVRL                        | RDPAD           | 2604.35     | <0.10  | 0.10   |
| Procholecystokinin                | 56-63                | DGEPR           | ARLGALLA                                     | RYIQQ           | 783.50      | <0.10  | 0.10   |
| Procholecystokinin                | 72-93                | APRRK           | (APSGRMSVLKNLQSLDPSHRIS)                     | DRDYM           | 2392.26     | <0.10  | 0.10   |
| Prodynorphin                      | Dynorphin A10-17     | LRRIR           | PKLKWDNQ                                     | KRYGG           | 1027.55     | <0.10  | 0.10   |
| Prodynorphin                      | Dynorphin A17        | DLYKR           | (YGGFLRRIRPKLKWQDQ)                          | KRYGG           | 2146.19     | <0.10  | 0.10   |
| Proenkephalin                     | Leu-Enkephalin       | DYQKR           | YGGFL                                        | KRFAE           | 555.27      | <0.10  | 0.10   |
| Proopiomelanocortin               | Des-acetyl-MSH       | REGKR           | SYSMEHFRWGKPV-amide                          | GKKRR           | 1621.77     | <0.10  | 0.10   |
| Proopiomelanocortin               | Alpha-MSH            | REGKR           | Ac-SYSMEHFRWGKPV-amide                       | GKKRR           | 1663.79     | <0.10  | 0.10   |
| Proopiomelanocortin               | Alpha-MSH (oxidized) | REGKR           | Ac-SYS-Mox-EHFRWGKPV-amide                   | GKKRR           | 1679.80     | <0.10  | 0.10   |
| VGf                               | 487-507              | EKRKR           | KKNAPPEPVPPRAAAPATHV                         | RSPQP           | 2170.20     | <0.10  | 0.10   |
| VGf                               | 180-209              | SNAKR           | (QQETAAAEETRTHLTRVNLESPGPERVW)               | RASWG           | 3406.69     | <0.10  | 0.10   |
| Procholecystokinin                | 71-94                | EAPRR           | KAPSGRMSVLKNLQSLDPSHRISD                     | RDYMG           | 2635.39     | 0.42   | 0.10   |
| Proopiomelanocortin               | J-peptide            | AAQRR           | AEEEAVMGDGSGPEPSPRE-amide                    | GKRSY           | 1939.86     | 0.42   | 0.10   |
| Proneuropeptide Y                 | Neuropeptide Y       | signal peptide  | (YPSKPDNPGEDAPAEDMARYYSALRHYINLITRQRY-amide) | GKRSS           | 4271.73     | 0.43   | 0.10   |
| ProSAAS                           | Big SAAS 1-24        | signal peptide  | ARPVKEPRSLSAASAPLVETSTPL                     | RLRRA           | 2476.37     | 0.76   | 0.10   |
| ProSAAS                           | GAV 5-28             | RAVPR           | GEAAGAVQELARALAHILLEAERQE                    | RARAE           | 2531.31     | 0.85   | 0.10   |
| Provasopressin                    | 151-165              | LLLLL           | VQLAGTRESVDSAKP                              | RVY*            | 1556.82     | 0.93   | 0.10   |
| Prothytrotropin Releasing Hormone | 25-50                | signal peptide  | LLEAAQEEGAVTPDLPGLEKVVQRPE                   | RRFLR           | 2787.48     | 0.95   | 0.10   |
| ProSAAS                           | Little SAAS 1-16     | VKEPR           | SLSAASAPLVETSTPL                             | RLRRA           | 1542.81     | 0.95   | 0.10   |
| Secretogranin II                  | 300-316              | EENRR           | ESKDQSEDASKVITYL                             | RRLVN           | 1924.96     | 1.09   | 0.10   |
| Procholecystokinin                | 65-94                | ALLAR           | (YIQQVRKAPSGRMSVLKNLQSLDPSHRISD)             | RDYMG           | 3422.82     | 1.45   | 0.10   |
| Pronociceptin/orphanin FQ         | Nociceptin           | QLQKR           | FGGFTGARKSARKLANQ                            | KRFSE           | 1807.98     | 0.18   | 0.10   |
| Prodynorphin                      | Dynorphin A8         | DLYKR           | YGGFLRRI                                     | RPKLIK          | 980.56      | <0.10  | 0.11   |
| Proenkephalin                     | 218-228              | GFMRR           | VGRPEWMMDYQ                                  | KRYGG           | 1465.65     | <0.10  | 0.11   |
| Chromogranin B                    | 438-446              | REEKR           | LLDEGHYPV                                    | RESPI           | 1041.52     | 0.56   | 0.11   |
| Proneurotensin                    | Neurotensin          | YILKR           | pyroE-LYENKPRRPYIL                           | KRGSY           | 1671.91     | 0.85   | 0.11   |

|                                     |                     |                |                                   |       |         |       |      |
|-------------------------------------|---------------------|----------------|-----------------------------------|-------|---------|-------|------|
| Proopiomelanocortin                 | CLIP                | VGKKR          | RPVKVYPNVAENESAEAFPLEF            | KRELE | 2505.26 | <0.10 | 0.12 |
| Proneurotensin                      | Neuromedin N        | EVIKR          | KIPYIL                            | KRQLY | 745.47  | 0.56  | 0.12 |
| ProSAAS                             | GAV                 | LRLRR          | AVPRGEAAGAVQELARALAHILLEAERQE     | RARAE | 2954.58 | 0.61  | 0.12 |
| Progastrin Releasing Peptide        | 43-52 amide         | KMYPR          | (GSHWAVGHLM-amide)                | GKKST | 1092.51 | <0.10 | 0.13 |
| Proopiomelanocortin                 | CLIP + phosphate    | VGKKR          | RPVKVYPNVAENI-phosphoS-AEAFPLEF   | KRELE | 2585.23 | <0.10 | 0.13 |
| VGF                                 | 489-507             | RKRKK          | NAPPEPVPPRAAPATHV                 | RSPQP | 1914.01 | 0.54  | 0.13 |
| Proenkephalin                       | 197-208             | RSLKR          | SPQLEDEAKELQ                      | KRYGG | 1385.67 | 0.74  | 0.13 |
| Chromogranin B                      | 313-330             | SEERR          | PSPKESKEADVATVRLGE                | KRSHH | 1911.99 | <0.10 | 0.14 |
| Proenkephalin                       | Octapeptide         | MSSKR          | YGGFMRSI                          | KRSPQ | 929.45  | <0.10 | 0.14 |
| Proenkephalin                       | 238-261 + phosphate | GFLKR          | FAESLP-phosphoS-DEEGENYSKEVPEIE   | KRYGG | 2577.06 | 0.57  | 0.14 |
| Chromogranin A                      | 358-371             | WEDKR          | WSRMDQLAKELTAE                    | KRLEG | 1676.82 | <0.10 | 0.15 |
| Chromogranin B                      | 438-454             | REEKR          | LLDEGHYPVRESPIDTA                 | KRYPQ | 1910.93 | <0.10 | 0.15 |
| Procholecystokinin                  | 72-94               | APRRK          | APSGRMSVKNLQSLDPSHRISD            | RDYMG | 2507.29 | <0.10 | 0.15 |
| Procholecystokinin                  | 46-69               | RRQLR          | (AVLRDTDGEPRARLGALLARYIQQV)       | RKAPS | 2665.51 | <0.10 | 0.15 |
| Promelanin Concentrating Hormone    | Neuropeptide EI     | EQEKR          | EIGDEENSAKFPI-amide               | GRRDF | 1446.68 | <0.10 | 0.15 |
| Protachykinin A                     | 72-95               | LMGKR          | DADSSVEKQVALLKALYGHGQISH          | KRHKT | 2565.32 | <0.10 | 0.15 |
| Provasoactive Intestinal Peptide    | 111-122             | LIGKR          | ISSISEDVPI                        | KRHSD | 1242.63 | <0.10 | 0.15 |
| Chromogranin B                      | 588-597             | GYEKR          | SFARAPQLDL                        | KRQYD | 1116.59 | 0.33  | 0.15 |
| CART                                | 33-52               | RRQLR          | APGAMLQIEALQEVLLKLLKS             | KRIPI | 2166.25 | <0.10 | 0.16 |
| Chromogranin A                      | 392-402             | SFTRR          | AYGFRDPGPQL                       | RRGWR | 1219.60 | <0.10 | 0.17 |
| Prodynorphin                        | Dynorphin B13       | DNQKR          | (YGGFLRRQFKVVT)                   | RSQEN | 1569.88 | <0.10 | 0.17 |
| Proenkephalin                       | Metorphamide        | ELQKR          | YGGFMRRV-amide                    | GRPEW | 983.50  | <0.10 | 0.17 |
| Procholecystokinin                  | 46-63               | RRQLR          | AVLRDTDGEPRARLGALLA               | RYIQQ | 1878.08 | 0.79  | 0.17 |
| Prohormone Convertase 2             | 94-104              | ERDPR          | IKMALQQEGFD                       | RKKRG | 1278.64 | <0.10 | 0.19 |
| Protachykinin A                     | Substance P         | QRIAR          | RPKPQQFFGLM-amide                 | GKRAL | 1346.74 | 0.62  | 0.19 |
| Prothyrotropin Releasing Hormone    | 160-169             | HPGRR          | SFPWMESDVT                        | KRQHP | 1197.50 | 0.84  | 0.19 |
| Protachykinin B                     | Neurokinin B        | LPQKR          | DMHDFEVGLM-amide                  | GKRNS | 1209.52 | 0.84  | 0.20 |
| Secretogranin III                   | 23-36               | signal peptide | FPKPEGSQDKSLHN                    | RELSA | 1582.77 | 0.94  | 0.20 |
| Chromogranin A                      | 374-390             | TAEKR          | LEGEDDPDRSMKLSFRT                 | RAYGF | 1994.94 | <0.10 | 0.21 |
| Chromogranin B                      | 457-466             | DTAKR          | YPOSKWQEQE                        | KNYLN | 1321.59 | <0.10 | 0.23 |
| Proenkephalin                       | 238-261             | GFLKR          | FAESLPSEEGENYSKEVPEIE             | KRYGG | 2497.10 | 0.55  | 0.23 |
| Propeptidyl-amidating-monooxygenase | Cleaved pro peptide | signal peptide | FRSPLSVF                          | KRFKE | 951.53  | 0.83  | 0.23 |
| Protachykinin A                     | Neurokinin A        | ISHKR          | HKTDSFVGLM-amide                  | GKRAL | 1132.55 | 0.41  | 0.24 |
| ProSAAS                             | 62-91               | LRLRR          | (AVPRGEAAGAVQELARALAHILLEAERGERA) | RAEAQ | 3181.71 | 1.08  | 0.24 |

|                                |                    |                |                            |       |         |       |      |
|--------------------------------|--------------------|----------------|----------------------------|-------|---------|-------|------|
| Prodynorphin                   | Alpha-neoendorphin | KQAKR          | YGGFLRKYPK                 | RSSEM | 1227.68 | 0.32  | 0.25 |
| Chromogranin B                 | 516-535            | EKRKR          | LGALFNYPFDPLQWKNSDFE       | KRGNP | 2400.15 | 0.38  | 0.25 |
| Prodynorphin                   | Beta-neoendorphin  | KQAKR          | YGGFLRKYP                  | KRSSE | 1099.58 | 0.83  | 0.25 |
| Prothytropin Releasing Hormone | 178-200            | HPQRR          | FIDPELQRSWEETEGLMPE        | KRQHP | 2677.19 | 0.97  | 0.29 |
| ProSAAS                        | Little SAAS        | VKEPR          | SLSAASAPLVETSTPLRL         | RRAVP | 1812.01 | 0.80  | 0.41 |
| Procholecystokinin             | 43-55              | EAPRR          | (QLRAVLRDGEPR)             | ARLGA | 1509.84 | 0.89  | 0.51 |
| ProSAAS                        | Little SAAS 5-18   | RLSA           | ASAPLVETSTPLRL             | RRAVP | 1453.81 | 0.80  | 0.57 |
| 7B2                            | 167-176            | KWNKK          | (LLYEKMKGGQ)               | RRKRR | 1165.60 | <0.10 | 0.58 |
| ProSAAS                        | PEN                | RRLRR          | SVDQDLGPEVPPENVLGALLRV     | KRLN  | 2316.23 | 0.86  | 0.64 |
| ProSAAS                        | Big SAAS           | signal peptide | ARPVKEPRSLSAASAPLVETSTPLRL | RRAVP | 2745.55 | 0.76  | 1.10 |

Abbreviations are defined in the other Tables. PC2: WT data is from the present study. Fat: WT data compares *Cpe<sup>fat/fat</sup>* and WT mice, and was published in Zhang et al. 2008.
